1 Isoprenoid biosynthesis regulation in poplars by methylerythritol  
2 phosphate and mevalonic acid pathways

3

4 Ali Movahedi<sup>1</sup>, Hui Wei<sup>1,†</sup>, Boas Pucker<sup>2,†</sup>, Tingbo Jiang<sup>3</sup>, Weibo Sun<sup>1</sup>, Dawei Li<sup>1</sup>, Liming Yang<sup>1,\*</sup>,  
5 and Qiang Zhuge<sup>1,\*</sup>

6

7 <sup>1</sup> Co-Innovation Center for Sustainable Forestry in Southern China, Key Laboratory of Forest  
8 Genetics & Biotechnology, Ministry of Education, College of Biology and the Environment,  
9 Nanjing Forestry University, Nanjing, China; ali\_movahedi@njfu.edu.cn (A.M.);  
10 15850682752@163.com (H.W.); czswb@njfu.edu.cn (W.S.); dwli@njfu.edu.cn (D.L.);  
11 yangliming@njfu.edu.cn (L.Y.); qzhuge@njfu.edu.cn (Q.Z.)

12 <sup>2</sup> Institute of Plant Biology, TU Braunschweig, Braunschweig, Germany; b.pucker@tu-  
13 braunschweig.de (B.P.)

14 <sup>3</sup> State Key Laboratory of Tree Genetics and Breeding, Northeast Forestry University, Harbin,  
15 China; tbjiang@yahoo.com (T.J.)

16

17

18 \* Correspondence: yangliming@njfu.edu.cn; qzhuge@njfu.edu.cn

19

20 † These authors contributed equally as the first author.

21

22

23

24

25

26

27

28

29

30

31

32 **Abstract**

33 The isoprenoids found in plants are extremely important to survive with various human  
34 applications, such as flavoring, fragrance, dye, pharmaceuticals, and biomass used for biofuels.  
35 Methylerythritol phosphate (MEP) and mevalonic acid (MVA) pathways are critical in plants,  
36 responsible for isoprenoid biosynthesis. 1-deoxy-D-xylulose5-phosphate synthase (DXS) and  
37 1-deoxy-D-xylulose5-phosphate reductoisomerase (DXR) catalyze the rate-limiting steps in the  
38 MEP pathway, while 3-hydroxy-3-methylglutaryl-CoA reductase (HMGR) catalyzes the rate-  
39 limiting step in the MVA pathway. Here, we showed while *PtHMGR* overexpressors (OEs)  
40 exhibited different MEP- and MVA-related gene expressions compared with non-transgenic  
41 poplars (NT), the *PtDXR*-OEs revealed upregulated MEP-related and downregulated MVA-  
42 related gene expressions. *PtDXR* and *PtHMGR* overexpressions caused changes in MVA-  
43 derived trans-zeatin-riboside, isopentenyl adenosine, castasterone, and 6-deoxocastasterone  
44 well as MEP-derived carotenoids and gibberellins. In *PtHMGR*-OEs, the accumulated geranyl  
45 diphosphate synthase (*GPS*) and geranyl pyrophosphate synthase (*GPPS*) transcript levels in  
46 the MEP pathway led to an accumulation of MEP-derived isoprenoids. In contrast,  
47 upregulation of farnesyl diphosphate synthase (*FPS*) expression in the MVA pathway  
48 contributed to increased levels of MVA-derived isoprenoids. In addition, *PtHMGR*-OEs  
49 increased MEP-related *GPS* and *GPPS* transcript levels, expanded MEP-derived isoprenoid  
50 levels, changed *FPS* transcript levels, and affected MVA-derived isoprenoid yields. These  
51 results demonstrate the contribution of MVA and MEP pathways regulating isoprenoid  
52 biosynthesis in poplars.

53 **Keywords:** MEP; MVA; HMGR; DXR; Isoprenoid biosynthesis

54

55

56

57

58

59

60

61

62

## 63 **1. Introduction**

64 Biosynthesis of isoprenoids (terpenoids) is essential for all living organisms. There are  
65 over 50,000 distinct molecules in living organisms that are isoprenoids, presenting many  
66 functional and structural properties (Thulasiram et al., 2007). Isoprenoids play vital roles in  
67 plant growth and development, as well as in membrane fluidity, photosynthesis, and  
68 respiration. As specific metabolites, they join in plant-pathogen and allelopathic interactions  
69 to preserve plants upon pathogens and herbivores, and they are also created to draw  
70 pollinators and seed-dispersing animals. Numerous isoprenoids are of commercial importance  
71 for rubber products and drugs, flavors, fragrances, agrochemicals, nutraceuticals,  
72 disinfectants, and pigments (Bohlmann and Keeling, 2008). A wide range of isoprenoid  
73 biochemical processes are involved in photosynthesis in plants, including electron transfer,  
74 quenching of excited chlorophyll triplets, light-harvesting, and energy conversion (Malkin R,  
75 2000). Chlorophylls, consisting of the heme pathway-derived tetrapyrrole ring with an  
76 appended isoprenoid-derived phytol chain, exist in all reaction center and antenna complexes  
77 to absorb light energy and transfer electrons to the reaction centers. The linear or partially  
78 cyclized carotenes and their oxygenated derivative xanthophyll are isoprenoids that extinguish  
79 excess excitation energy through light-harvesting to preserve the light-harvesting system.  
80 However, these isoprenoids operate as attractants in flowers and fruits as well (Rodriguez-  
81 Concepcion, 2010). A large proportion of the isoprenoid flux in plants is conducted toward the  
82 synthesis of membrane sterol lipids. In contrast to vertebrates synthesizing cholesterol, higher  
83 plants synthesize a complex mix of sterol lipids called phytosterols (Boutte and Grebe, 2009).

84 Plants isoprenoids include gibberellins (GAs), carotene, Lycopene, cytokinins (CKs),  
85 strigolactones (GRs), and brassinosteroids (BRs) are produced through methylerythritol  
86 phosphate (MEP) and mevalonic acid (MVA) pathways (Henry et al., 2015; van Schie et al.,  
87 2006; Xie et al., 2008). The mentioned pathways are involved in plant growth, development,  
88 and response to environmental changes (Bouvier et al., 2005; Kirby and Keasling, 2009). The  
89 isopentenyl diphosphate isomerase (IDI) catalyzes the conversion of the isopentenyl  
90 diphosphate (IPP) into dimethylallyl diphosphate (DMAPP), leading to provide the basic  
91 materials for all isoprenoid productions (Hemmerlin, 2012; Lu et al., 2012; Zhang et al., 2019).  
92 The produced IPP and DMAPP play essential roles in MEP and MVA pathways crosstalk

93 (Huchelmann et al., 2014; Liao et al., 2016). The MVA pathway reactions appear in the  
94 cytoplasm, endoplasmic reticulum (ER), and peroxisomes (Cowan et al., 1997; Roberts, 2007),  
95 producing sesquiterpenoids and sterols. The 3-hydroxy-3-methylglutaryl-CoA reductase  
96 (HMGR), a rate-limiting enzyme in the MVA pathway, catalyzes 3-hydroxy-3-methylglutary-  
97 CoA (HMG-CoA) to form MVA (Cowan et al., 1997; Roberts, 2007).

98 Reactions of the MEP pathway occur in the chloroplast and produce carotenoids, GAs,  
99 and diterpenoids. 1-deoxy-D-xylulose5-phosphate synthase (DXS) and 1-deoxy-D-xylulose5-  
100 phosphate reductoisomerase (DXR) are rate-limiting enzymes in the MEP pathway that  
101 catalyze the conversion of D-glyceraldehyde3-phosphate (D-3-P) and pyruvate into 2-C-  
102 methyl-D-erythritol4-phosphate (MEP) (Cordoba et al., 2009; Perreca et al., 2020; Wang et al.,  
103 2012; Yamaguchi, 2018). Terpenoids like phytoalexin and volatile oils play essential roles in  
104 plant growth, development, and disease resistance (Hain et al., 1993; Ren et al., 2008).  
105 Photosynthetic pigments convert organic carbon into plant biomass (Esteban et al., 2015). In  
106 addition to an extensive range of natural functions in plants, terpenoids also consider the  
107 potential for biomedical applications. Paclitaxel is one of the most effective chemotherapy  
108 agents for cancer treatment, and artemisinin is an anti-malarial drug (Kim et al., 2016a; Kong  
109 and Tan, 2015).

110 Previous metabolic engineering studies have proposed strategies to improve the  
111 production of specific metabolites in plants (Ghirardo et al., 2014; Opitz et al., 2014). For  
112 example, PMT and H6H encoding the putrescine N-methyltransferase and hyoscyamine 6  $\beta$ -  
113 hydroxylase respectively produced significantly higher scopolamine in transgenic henbane  
114 hairy root. Also, HCHL encoding p-hydroxycinnamoyl-CoA hydratase/lyase accumulated the  
115 glucose ester of p-hydroxybenzoic acid (pHBA) in *Beta vulgaris* hairy root (Rahman et al., 2009;  
116 Zhang et al., 2004). The 3-hydroxy-3-methylglutaryl-coenzyme A synthase (HMGS) is the  
117 second enzyme in the MVA pathway. Liao et al. (2018) confirmed that *HMGS* overexpression  
118 of *Brassica juncea* upregulates carotenoid and phytosterol in tomatoes. HMGR has been  
119 considered a critical factor in metabolically engineering terpenoids (Aharoni et al., 2005;  
120 Dueber et al., 2009). In addition, *PgHMGR1* overexpression of ginseng increases ginsenosides  
121 content, a necessary pharmaceutically active component (Kim, 2014).

122 Transgenic tobacco overexpressing the *Hevea brasiliensis* *HMGR* enhanced the  
123 phytosterol levels (Schaller et al., 1995). It has been shown (Dai et al., 2011)

124 that *SmHMGR2* in *Salvia miltiorrhiza*, resulting in the improvement of squalene and  
125 tanshinone contents. Moreover, *Arabidopsis thaliana HMGR1 (AtHMGR1)* enhanced the  
126 phytosterol levels in the first generation of transgenic tomatoes (Enfissi et al., 2005). While  
127 the deaccumulation of *DXR* transcripts resulted in lower pigmentation and chloroplast  
128 appearance defects, the upregulated *DXR* expression caused the MEP-derived plastid  
129 isoprenoids to accumulate. Therefore, *DXR* can be genetically engineered to regulate the  
130 content of terpenoids and expressed *DXR* in *Arabidopsis* and observed enhanced flux through  
131 the MEP pathway (Carretero-Paulet et al., 2006). While the *A. thaliana DXR* overexpression  
132 caused the diterpene anthiolimine to accumulate in *Salvia sclarea* hairy roots (Vaccaro et al.,  
133 2014), the peppermint *DXR* overexpression resulted in essential oil inflation (about 50%) with  
134 no significant variations in monoterpene composition (Mahmoud and Croteau, 2001).  
135 Furthermore, previous studies have shown the exchange of metabolic intermediates included  
136 in the MVA- and MEP pathways through plastid membranes (Laule, 2003; Liao, 2006). In  
137 summary, the overexpression of genes involved in the MVA- and MEP pathways can change  
138 the abundances or activities of related enzymes and metabolic products, causing a new  
139 opportunity for plant breeding to enhance the accumulation of related metabolic products.

140 Poplars as an economic and energy species are widely used in industrial and agricultural  
141 production. Its fast growth characteristics and advanced resources in artificial afforestation  
142 play a vital role in the global ecosystem (Devappa, 2015).

143 This study investigates the poplar isoprenoid biosynthesis. We showed that the  
144 overexpression of the MVA-specific *PtHMGR* gene upregulated not only MVA- but MEP-  
145 related genes in the transcript levels. We also proved that the overexpression of the MEP-  
146 specific *PtDXR* gene caused downregulating MVA-related genes compared with upregulating  
147 MEP-related genes, enhancing terpenoid accumulation. Taken together, these results indicate  
148 that the MEP is a dominant pathway in contribution with the MVA pathway to produce  
149 isoprenoids secondary metabolites, and *HMGR* and *DXR* genes play key regulation points in  
150 these pathways.

## 151 **2. Materials and Methods**

### 152 2.1. *Plant materials and growth conditions*

153 Non-transgenic *P. trichocarpa* and *Populus × euramericana* cv. 'Nanlin 895' plants were

154 cultured in half-strength Murashige and Skoog (1/2 MS) medium (pH 5.8) under conditions of  
155 24°C and 74% humidity (Movahedi et al., 2015). Subsequently, NT and transgenic poplars were  
156 cultured in 1/2 MS under long-day conditions (16 h light/8 h dark) at 24°C for 1 month  
157 (Movahedi et al., 2018).

## 158 2.2. *PtHMGR and PtDXR genes isolation and vector construction*

159 To produce cDNA, total RNA was extracted from *P. trichocarpa* leaves and processed with  
160 PrimeScript™ RT Master Mix, a kind of reverse transcriptase (TaKaRa, Japan). Forward and  
161 reverse primers (Supplementary Table 1: *PtHMGR*-F and *PtHMGR*-R) were designed, and the  
162 open reading frame (ORF) of *PtHMGR* was amplified via PCR. We then used the total volume  
163 of 50µl including 2 µl primers, 2.0 µl cDNA, 5.0 µl 10 × PCR buffer (Mg<sup>2+</sup>), 4µl dNTPs (2.5 mM),  
164 0.5 µl rTaq polymerase (TaKaRa, Japan) for the following PCR reactions: 95°C for 7 min, 35  
165 cycles of 95°C for 1 min, 58°C for 1 min, 72°C for 1.5 min, and 72°C for 10 min. Subsequently,  
166 the product of the *PtHMGR* gene was ligated into the pEASY-T3 vector (TransGen Biotech,  
167 China) based on blue-white spot screening, and the *PtHMGR* gene was inserted into the vector  
168 pGWB9 (Song et al., 2016) using Gateway technology (Invitrogen, USA). On the other hand, all  
169 steps to generate cDNA, RNA extraction, PCR, pEASY-T3 ligation, and vector construction  
170 (pGWB9-PtDXR) of *PtDXR* have been carried out according to Xu et al. (2019).

## 171 2.3. *phylogenetic analyses*

172 We applied the ClustalX for multiple sequence alignment of HMGR proteins, and  
173 MEGA5.0 software was used to construct a phylogenetic tree using 1000 bootstrap replicates.  
174 The amino acid sequences of HMGR from *Populus trichocarpa*, *Arabidopsis thaliana*,  
175 *Gossypium raimondii*, *Malus domestica*, *Manihot esculenta*, *Oryza sativa*, *Prunus persica*,  
176 *Theobroma cacao*, and *Zea mays* were obtained from the National Center for Biotechnology  
177 Information database (<https://www.ncbi.nlm.nih.gov/>) and Phytozome ([https://phytozome-](https://phytozome-next.jgi.doe.gov/)  
178 [next.jgi.doe.gov/](https://phytozome-next.jgi.doe.gov/)).

## 179 2.4. *Transgenic poplars: generation and confirmation*

180 *Agrobacterium tumefaciens* var. EHA105 was used for the infection of poplar leaves and  
181 petioles (Movahedi et al., 2014). Poplar buds were screened on differentiation MS medium

182 supplemented with 30 µg/mL Kanamycin (Kan). Resistant buds were planted in bud elongation  
183 MS medium containing 20 µg/mL Kan and transplanted into 1/2 MS medium including 10  
184 µg/mL Kan to generate resistant poplar trees. Genomic DNA has been extracted from putative  
185 transformants one-month-old leaves grown on a kanamycin-containing medium using  
186 TianGen kits (TianGen BioTech, China). The quality of the extracted genomic DNA (250–350  
187 ng/µl) was determined by a BioDrop spectrophotometer (UK). PCR was carried out using  
188 designed primers (Supplementary Table 1: CaMV35S as the forward and PtHMGR as the  
189 reverse), Easy Taq polymerase (TransGene Biotech), and 50 ng of extracted genomic DNA as a  
190 template to amplify about 2000 bp. In addition, total RNA was extracted from these one-  
191 month-old leaves to produce cDNA, as mentioned above. These cDNA then were applied to  
192 reverse transcription-quantitative PCR (RT-qPCR) (Supplementary Table 1: PtHMGR forward  
193 and reverse) for comparing the transformants *PtHMGR-OEs* expressions with NT poplars and  
194 transforming confirmation.

## 195 2.5. *Phenotypic properties evaluation*

196 To evaluate phenotypic changes, we selected 45-day-old poplars from PtHMGR-and  
197 PtDXR-OEs and NT poplars. We then simultaneously calculated the stem lengths (mm) and  
198 stem diameters (mm) every day and recorded them. All recorded were analyzed by GraphPad  
199 Prism 9, applying ANOVA one way (Supplementary Table 2).

## 200 2.6. *Analyses via qRT-PCR*

201 12-month-old *PtDXR-OEs* (Xu et al., 2019) and *PtHMGR-OE* poplars (Soil-grown poplars)  
202 have been used to extract total RNA. The qRT-PCR was performed to identify MVA- and MEP-  
203 related gene expression levels in NT, *PtDXR-OE*, and *PtHMGR-OE* poplars. The qRT-PCR was  
204 served with a StepOne Plus Real-time PCR System (Applied Biosystems, USA) and SYBR Green  
205 Master Mix (Roche, Germany). Poplar *Actin* (*PtActin*) (XM-006370951.1) was previously tested  
206 as a reference gene for this experiment (Zhang et al., 2013). The following conditions were  
207 used for qRT-PCR reactions: pre-denaturation at 95°C for 10 min, 40 cycles of denaturation at  
208 95°C for 15 s, and a chain extension at 60°C for 1 min. Three independent experiments were  
209 conducted using gene-specific primers (Supplementary Table 1: PtHMGR forward and reverse).

## 210 2.7. *Metabolite analyses via high-performance liquid chromatography-tandem* 211 *mass spectrometry*

212 The isopropanol/acetic acid extraction method extracted poplar endogenous hormones  
213 from NT, *PtDXR-OE*, and *PtHMGR-OE* leaves. GAs and CKs were extracted from, and then HPLC-  
214 MS/MS (Qtrap6500, Agilent, USA) was used to quantify levels of GAs, zeatin, tZR, and IPA. Also,  
215 methanol considered as solvent was used to extract 5-Deoxystrigol (5-DS), CS, and DCS, and  
216 HPLC-MS/MS (Agilent1290, AB; SCIEX-6500Qtrap, Agilent; USA) was also used to determine  
217 the contents of 5-DS, CS, and DCS. In addition, acetone, as a solvent, was used to isolate the  
218 carotenoid component of poplar leaves. To identify the carotenoid contents, the peak areas  
219 of carotenoids analyzed by HPLC (Symmetry Shield RP18, Waters, USA) were used to draw  
220 standard carotenoid curves, including  $\beta$ -carotene, Lycopene, and Lutein. Also, the HPLC was  
221 used to determine the contents of carotenoids, including  $\beta$ -carotene, Lycopene, and Lutein in  
222 NT and OE lines.

## 223 **3. Results**

### 224 3.1. *Identification, analyses, and Isolation of PtHMGR and PtDXR genes*

225 *Populus trichocarpa* v3.1 (Phytozome genome ID: 444, NCBI taxonomy ID: 3694) has been  
226 applied to download 595 amino acids (aa) PtHMGR (Potri.004G208500.1) and the other  
227 species' HMGR to align and analyze. High similarity, including lots of conserved aa  
228 accompanied by specific similar domains, HMG-CoA-binding motifs (EMPVGYVQIP' and  
229 'TTEGCLVA), and NADPH-binding motifs (DAMGMNMV' and 'VGTVGGGT) (Ma et al., 2012)  
230 (Supplementary Figure 1), confirmed the PtHMGR protein analytically. Consequently, a  
231 phylogenetic tree based on the various species HMGR supported the PtHMGR candidate  
232 identification (Supplementary Figure 2). The tblastn was then applied to reveal 2614  
233 bp *PtHMGR* located on Chr04:21681480..21684242 with a 1785 bp CDS. After that, the  
234 amplified 1857 bp of the *PtHMGR* from *Populus trichocarpa* cDNA confirmed the putative  
235 transgenic lines (Supplementary Figure 3a), exhibiting amplicons in PCR identification  
236 compared to NT poplar (Supplementary Figure 3b). The transgenic poplars (*PtHMGR-OEs*) also  
237 showed enhanced *PtHMGR* expressions than NT (Supplementary Figure 3c), indicating  
238 successful overexpression of *PtHMGR* in poplar. The *PtDXR* gene, which has been isolated,  
239 sequenced, and analyzed previously by the authors (Xu et al., 2019), was then transferred into



240 poplar genome to generate PtDXR-OEs used in this study.

### 241 3.2. *PtHMGR- and PtDXR overexpressions regulate MVA-related gene expressions*

242 MVA-related genes *AACT*, *MVK*, *MVD*, and *FPS*, except *HMGS*, were significantly  
243 upregulated in *PtHMGR-OE* transgenics than NT poplars (Supplementary Figure 4a). In  
244 contrast, while only *FPS* revealed significant upregulation by *PtDXR-OEs* in transgenics  
245 compared with NT, the other MVA-related genes *AACT*, *HMGS*, *HMGR*, and *MVK* were  
246 considerably downregulated (Supplementary Figure 4a). However, the mean comparison of  
247 MVA-related gene expressions regulated by *HMGR* and *DXR* overexpressing exhibited  
248 significant upregulated *MVK* through *PtHMGR-OEs* (Figure 1a). The *HMGS* was significantly  
249 downregulated within *PtHMGR- and PtDXR-OEs*, and *MVK* was downregulated  
250 by *PtDXR* overexpression (Figure 1a). The mean comparison of *AACT*, *MVD*, and *FPS* revealed  
251 upregulation through *PtHMGR-OEs*, while *AACT* and *MVD* showed downregulation  
252 through *PtDXR-OEs* (Figure 1a).

### 253 3.3. *PtHMGR- and PtDXR overexpressions regulate MEP-related gene expressions*

254 While, the expression of MEP-related genes *DXS*, *DXR*, 1-hydroxy-2-methyl-2-(E)-butenyl-  
255 4-diphosphate synthase (*HDS*), 1-hydroxy-2-methyl-2-(E)-butenyl-4-diphosphate reductase  
256 (*HDR*), *IDI*, and *GPPS* were significantly upregulated in all *PtHMGR-OEs* transgenic poplars in  
257 comparison with NT, the *GPS* overexpression was enhanced only by *PtHMGR-*  
258 *OE3* (Supplementary Figure 4c). In addition, 2-C-methyl-d-erythritol4-phosphate  
259 cytidyltransferase (*MCT*) and 4-diphosphocytidyl-2-C-methyl-D-erythritol kinase (*CMK*) have  
260 been downregulated by *PtHMGR-OEs* (Supplementary Figure 4c). In contrast, all MEP-related  
261 genes were upregulated significantly by *PtDXR* overexpression (Supplementary Figure 4d). In  
262 total, the comparison of the effect of *PtHMGR* on MEP-related genes exhibited significant  
263 upregulations of *HDR*, *IDI*, *GPS*, and *GPPS* (Figure 1b). These comparisons also revealed the  
264 upregulation of *DXS* and *HDS* except *MCT* and *CMK*, downregulated by *PtHMGR*  
265 overexpression (Figure 1b). In contrast, the mean comparison of the effect of *PtDXR*  
266 overexpression on MEP-related genes exhibited upregulation of the all mentioned above  
267 genes (Figure 1b).

268 3.4. *MVA- and MEP-derived carotenoids are affected by PtHMGR-and PtDXR-OEs*

269  $\beta$ -carotene is a carotenoid synthesis that has been broadly used in the industrial  
270 composition of pharmaceuticals and as food colorants, animal supplies additives, and  
271 nutraceuticals. MVA-and MEP pathways have been proved effective in the biosynthesis of  $\beta$ -  
272 carotene (Yang, 2014). In addition, Lycopene is a carotenoid referring to C40 terpenoids and  
273 is broadly found in various plants, particularly vegetables and fruits. It has been shown that  
274 MVA and MEP-pathways directly influence the biosynthesis production of Lycopene (Kim et  
275 al., 2019; Wei et al., 2018). While Wille et al. (2004) showed that  $\beta$ -carotene and Lutein are  
276 synthesized using intermediates from the MEP pathway, Opitz et al. (2014) revealed that both  
277 MVA and MPE pathways contribute to producing isoprenoids such as  $\beta$ -carotene and Lutein.  
278 HPLC-MS/MS has analyzed the quantity of MVA and MEP derivatives. Our analyses revealed  
279 that *HMGR*-OEs caused a significant enhancement in Lycopene (an average of  $\sim 0.08$  ug/g),  $\beta$ -  
280 carotene (an average of  $\sim 0.33$  ug/g), and Lutein (an average of  $\sim 272$  ug/g) production  
281 compared with NT poplars ( $\sim 0.02$ ,  $\sim 0.08$ , and  $\sim 100$  ug/g respectively) (Figure 2a, b, and c;  
282 Supplementary Figure 5). The ABA-related gene expressions also have been calculated. Results  
283 revealed a significantly increased *ZEP1*, 2, and 3 relative gene expressions with averages of  
284  $\sim 2.85$ ,  $\sim 4.67$ , and  $\sim 2.92$  compared to NT with an average of  $\sim 1$  (Figure 2d). These results also  
285 showed meaningful enhancements of *NCED1*, 2, and 3 relative gene expressions with the  
286 averages of  $\sim 4.16$ ,  $\sim 3.79$ , and  $\sim 3.4$  compared to NT with an average of  $\sim 1$  (Figure 2e).

287 On the other hand, the levels of the MEP-derived substances lycopene,  $\beta$ -carotene, and  
288 Lutein were significantly increased in *PtDXR*-OEs with the averages of  $\sim 0.08$ , 0.22, 209.32 ug/g,  
289 respectively compared to NT poplars (Figure 3a, b, and c; Supplementary Figure 6). The  
290 analyses of ABA-related gene expressions revealed significantly increased *ZEP1*, 2, and 3  
291 relative gene expressions with the averages of  $\sim 2.63$ ,  $\sim 2.38$ , and  $\sim 3.86$  compared to NT with  
292 an average of  $\sim 1$  (Figure 3d). These results also showed meaningful enhancements of *NCED2*  
293 and 3 relative gene expressions with averages of  $\sim 2.25$  and  $\sim 2.21$  compared to NT with an  
294 average of  $\sim 1$  (Figure 2e). These results revealed a decreased average in *NCED1* relative gene  
295 expression with an average of  $\sim 0.66$  compared to NT poplars.

296 3.5. *MVA and MEP-related derivatives are influenced by PtHMGR- and PtDXR-OEs*

297 The other MVA and MEP derivatives such as GAs, trans-zeatin-riboside (tZR), isopentenyl

298 adenosine (IPA), 6-deoxyocastasterone (DCS), and castasterone (CS) productions affected  
299 by *PtHMGR*- and *PtDXR*-*OEs* have been analyzed. While Gibberellic acid (GA3) (a downstream  
300 product of MEP) ( an average of ~0.22 ng/g), tZR (an average of ~0.06 ng/g), IPA (an average  
301 of ~0.59 ng/g), DCS (an average of 4.95 ng/g) revealed significantly more productions induced  
302 by *HMGR*-*OEs*, the CS production (~0.095 ng/g) was decreased considerably compared to NT  
303 poplars (~0.10, ~0.03, ~0.37, ~1.50, and ~0.20 ng/g respectively) (Figure 4a-j). These results  
304 demonstrate that the *HMGR* gene interacts with MVA and MEP derivatives productions in  
305 plants. On the other hand, the *PtDXR* overexpression significantly affected the contents of  
306 MEP- and MVA-derived products except for CS. *PtDXR*-*OEs* showed a significant increase  
307 ~0.276 ng/g in the GA3 content (Figure 4a and f). The tZR content represented a 10-fold  
308 increase (~0.304 ng/g) affected by *PtDXR*-*OEs* compared to NT poplars (0.032 ng/g) (Figure 4b  
309 and g). The content of IPA in *PtDXR*-*OEs* meaningfully increased ~ 0.928 ng/g, compared to  
310 0.363 ng/g in NT poplars (Figure 4c and h) with a 3-fold increase. In addition, the DCS content  
311 considerably increased to ~3.36 ng/g, compared with ~1.50 ng/g in NT, representing a 3-fold  
312 increase in *PtDXR*-*OEs* (Figure 4d and i). By contrast, the content of CS in *PtDXR*-*OEs*  
313 significantly decreased (~0.137 ng/g) compared to NT poplar (0.203 ng/g), indicating  
314 significant down-regulation in *PtDXR*-*OEs* (Figure 4e and j). The HPLC-MS/MS chromatograms  
315 of GA, tZR, IPA, DCS, and CS standards are provided in Supplementary Figures 7–11.

### 316 3.6. *Phenotypic properties*

317 To investigate the growth and development resulting from different produced  
318 isoprenoids contents amongst the affected MVA-and MEP pathways contributions  
319 by *PtHMGR*-and *PtDXR*-*OEs*, we decided to evaluate phenotypic stem lengths and diameters  
320 changes. Results exhibited a significant increase in GA3 contents in *PtDXR*-*OEs* (Figure 4a)  
321 associated with a considerable rise in cytokinin tZR (Figure 4b), resulting in significantly more  
322 development in stem length compared to *PtHMGR*-*OEs* and NT poplars (Figure 5a and b).  
323 Regarding increasing ABA-related gene expressions (*ZEP* and *NCED*) in *PtHMGR*-*OEs* than  
324 *PtDXR*-*OEs* and NT poplars (Figure 5c and d) and also concerning insufficient increase cytokinin  
325 tZR in *PtHMGR*-*OEs* compared with NT poplars (Figure 4b), *PtHMGR* transgenics showed a  
326 shorter stem length that *PtDXR* transgenics compared with NT poplars (Figure 5a and b). We  
327 also observed that only *PtDXR*-*OEs* revealed a few significant increases in stem diameters than

328 PtHMGR-OEs and NT poplars (Figure 5e).

## 329 **4. Discussion**

### 330 4.1. *The HMGR and DXR crucial roles in isoprenoid biosynthesis*

331 Several studies report that HMGR activity is regulated by isoprenoid outcomes when  
332 stigmasterol and cholesterol reduce the HMGR activity by 35% (Russell and Davidson, 1982).  
333 Utilization of the isoprenoid growth control abscisic acid also prevented HMGR activity in pea  
334 by about 40%, while zeatin and gibberellin, other isoprenoid growth regulators, improved the  
335 activity of HMGR (Russell and Davidson, 1982). Maurey et al. (1986) reported that the  
336 alga *Ochromonas malhamensis* developed in mevinolin exhibited to 15-fold increase in  
337 microsomal HMGR activity, slightly influencing cell growth. Moreover, the MEP pathway is the  
338 primary precursor for required plastid isoprenoids (Wright et al., 2014). It has been shown  
339 that volatile compounds made by the MEP pathway are involved in plant protection against  
340 biotic and abiotic stresses (Gershenson and Dudareva, 2007). By modifying the expression of  
341 DXR, promising metabolite compounds have developed in the mint plant (Mahmoud and  
342 Croteau, 2002). In addition, the DXR overexpression in Arabidopsis resulted in accumulating  
343 isoprenoids such as tocopherols, carotenoids, and chlorophylls (Carretero-Paulet et al., 2006).  
344 DXR overexpression has also been proven to improve diterpene contents in transgenic  
345 bacteria (Morrone et al., 2010). Biotic stresses are vital in providing pharmaceutical  
346 terpenoids by expanding the number of enzymes included in biosynthetic pathways by  
347 controlling biosynthetic genes expression (Kang et al., 2009; Lu et al., 2016). Biotic stresses  
348 caused to improve DXR expression followed by triptophenolide content in *Tripterygium*  
349 *wilfordii* cell culture suspension (Tong et al., 2015).

### 350 4.2. *Overexpression of PtDXR results in upregulation of isoprenoid biosynthesis* 351 *gene expression*

352 Liao et al. (2018) showed that overexpression of *BjHMGS1* affects the expression levels  
353 of MEP- and MVA-related genes and slightly increases the transcript levels of *DXS* and *DXR* in  
354 transgenic plants. However, *DXS*, *DXR*, *HDS*, and *HDR* expression levels have been  
355 upregulated significantly in *PtHMGR-OE* poplars, while *MCT* and *CMK* are downregulated.

356 Similar to Liao et al. (2018) which the *BjHMGS1* overexpression in tomatoes significantly

357 increased the *GPS* and *GPPS* expressions, we exhibited that the *PtHMGR* overexpression  
358 enhanced the farnesyl diphosphate synthase (*FPS*), *GPS*, and *GPPS* expressions may  
359 stimulate the crosstalk between IPP and DMAPP, increasing the biosynthesis of plastidial C15  
360 and C20 isoprenoid precursors. Xu et al. (2012) showed that *HMGR* overexpression  
361 in *Ganoderma lucidum* caused upregulated *FPS*, squalene synthase (*SQS*), or lanosterol  
362 synthase (*LS*) mRNA expressions and developed the contents of ganoderic acid and  
363 intermediates, including squalene and lanosterol. In addition, the *BjHMGS1* overexpression in  
364 tomatoes significantly increased transcript levels of *FPS*, *SQS*, squalene epoxidase (*SQE*), and  
365 cycloartenol synthase (*CAS*) (Liao et al., 2018). This study exhibited that except  
366 for *HMGS* downregulating, the *AACT*, *MVK*, and *MVD* transcript levels were significantly  
367 upregulated in *PtHMGR-OE* poplars. We revealed that these enhanced gene expressions  
368 mainly were associated with the MVA-related genes contributing to the biosynthesis of  
369 sesquiterpenes and other C15 and universal C20 isoprenoid precursors.

#### 370 4.3. Overexpression of *PtDXR* affects MEP- and MVA-related genes

371 Zhang et al. (2018) showed that the *TwDXR* overexpression in *Tripterygium wilfordii*  
372 increases the *TwHMGS*, *TwHMGR*, *TwFPS*, and *TwGPPS* expressions but decreases the *TwDXS*  
373 expression. Moreover, Zhang et al. (2015) exhibited that the *NtDXR1* overexpression in  
374 tobacco increases the transcript levels of eight MEP-related genes, indicating that the *NtDXR1*  
375 overexpression led to upregulated MEP-related gene expressions. In *A. thaliana*, the *DXR*  
376 transcript level changes do not affect *DXS* gene expression or enzyme accumulation, although  
377 the *DXR* overexpression promotes MEP-derived isoprenoids such as carotenoids, chlorophylls,  
378 and taxadiene (Carretero-Paulet et al., 2006).

379 On the other hand, the potato *DXS* overexpression in *A. thaliana* led to upregulation of  
380 downstream *GGPPS* and phytoene synthase (*PSY*) genes (Henriquez et al., 2016). Furthermore,  
381 (Simpson et al., 2016) exhibited that the *A. thaliana DXS* overexpression in *Daucus carota*  
382 caused to enhance the *PSY* expression significantly.

383 In this study, while the *PtDXR-OEs* exposed higher MEP-related gene expressions than NT  
384 poplars, the *PtDXR-OEs* revealed significant downregulated MVA-related gene expressions  
385 than NT poplars. These findings illustrate that the MEP pathway regulates monoterpenes,  
386 diterpenes, and tetraterpenoids biosynthesis and could affect the MVA pathway.

387 The diversity of biosynthetic pathways, the complexity of metabolic networks, and the  
388 insufficient knowledge of gene regulation led to species-specific regulation patterns of MEP-  
389 and MVA-related gene expression. One possible conclusion is that MEP- and MVA-related  
390 genes often do not work alone but are co-expressed with upstream and downstream genes in  
391 the MEP- and MVA- pathways to carry out a specific function.

#### 392 4.4. *Overexpression of HMGR promotes the formation of GAs, and carotenoids in* 393 *plastids and accumulation of tZR, IPA, and DCS in the cytoplasm*

394 HMGR, as the rate-limiting enzyme in the MVA-pathway of plants, plays a critical role in  
395 controlling the flow of carbon within this metabolic pathway. The upregulation  
396 of *HMGR* significantly increases isoprenoid levels in plants. Overexpression of *HMGRs* of  
397 different plant species has been reported to raise isoprenoids levels significantly. The  
398 heterologous expression of *Hevea brasiliensis HMGR1* in tobacco increased the sterol content  
399 and accumulated intermediate metabolites (Schaller et al., 1995). The *A. thaliana HMGR*  
400 overexpression in *Lavandula latifolia* increased the levels of sterols in the MVA-and MEP-  
401 derived monoterpenes and sesquiterpenes (Munoz-Bertomeu et al., 2007). In addition,  
402 the *Salvia miltiorrhiza SmHMGR* overexpression in hairy roots developed MEP-derived  
403 diterpene tanshinone (Kai et al., 2011). In our study, ABA synthesis-related genes  
404 (*NCED1, NCED3, NCED6, ZEP1, ZEP2, and ZEP3*) and the contents of GA3 and carotenoids  
405 were upregulated in *PtHMGR-OE* poplar seedlings. This finding suggests that  
406 the *HMGR* overexpression may indirectly affect the biosynthesis of MEP-related isoprenoids,  
407 including GA3 and carotenoids. The accumulation of MVA-derived isoprenoids including tZR,  
408 IPA, and DCS was significantly elevated in *PtHMGR-OEs*, indicating  
409 that *PtHMGR* overexpression directly influences the biosynthesis of MVA-related isoprenoids.  
410 Therefore, the *HMGR* gene directly affects MVA-derived isoprenoids and indirectly affects the  
411 content of MEP-derived isoprenoids by changing the expression levels of MEP-related genes.

#### 412 4.5. *Higher levels of MEP- and MVA-derived products in PtDXR-OE seedlings*

413 DXR is the rate-limiting enzyme in the MEP pathway and an essential regulatory step in  
414 the cytoplasmic metabolism of isoprenoid compounds (Takahashi et al., 1998). Mahmoud and  
415 Croteau (2001) revealed that overexpression of *DXR* in *Mentha piperita* promoted the  
416 synthesis of monoterpenes in the oil glands and increased the production of essential oil yield

417 by 50%. However, the up-regulation of *DXR* expression did not lead to change in the complex  
418 oil composition significantly. Hasunuma et al. (2008) exhibited that overexpression of  
419 *Synechocystis sp.* strain PCC6803 *DXR* in tobacco resulted in increased levels of  $\beta$ -carotene,  
420 chlorophyll, antheraxanthin, and Lutein. Xing et al. (2010) showed that the *A. thaliana dxr*  
421 mutants caused to lack of GAs, ABA, and photosynthetic pigments (REF57). These mutants  
422 showed pale sepals and yellow inflorescences (Xing et al., 2010). In our study, the relatively  
423 higher abundance of GA3 and carotenoids in *PtDXR-OE* poplar seedlings indicated an effect of  
424 *DXR* overexpression. Combined with the result described above of increased *DXS*, *HDS*, *HDR*,  
425 *MCT*, *CMK*, *FPS*, *GPS*, and *GPPS* expression levels, we postulate that overexpression of *DXR* not  
426 only affects the expression levels of MEP-related genes but also changes the field of GA3, and  
427 carotenoids.

#### 428 4.6. *Communications exist between MVA- and MEP-pathways excess of IPP and* 429 *DMAPP*

430 Although the substrates of MVA- and MEP pathways differ, there are common  
431 intermediates like IPP and DMAPP (Figure 6). Blocking only the MVA or the MEP pathway,  
432 respectively, does not entirely prevent the biosynthesis of terpenes in the cytoplasm or  
433 plastids, indicating that some MVA and MEP pathways products can be transported and/or  
434 move between cell compartments (Aharoni et al., 2003; Aharoni et al., 2004; Gutensohn et  
435 al., 2013). For example, it has been shown that the transferring IPP from the chloroplast to  
436 cytoplasm observed through <sup>13</sup>C labeling, indicating that plentiful IPP is available for use in  
437 the MVA-pathway to produce terpenoids (Ma et al., 2017). In addition, segregation between  
438 the MVA- and MEP pathways is limited and might exchange some metabolites over the plastid  
439 membrane (Laule, 2003). Kim et al. (2016b) used clustered, regularly interspaced short  
440 palindromic repeats (CRISPR) technology to reconstruct the lycopene synthesis pathway and  
441 control the flow of carbon in the MEP-and MVA-pathways. The results showed that the  
442 expression of MVA-related genes was reduced by 81.6%, but the lycopene yield was  
443 significantly increased. By analyzing gene expression levels and metabolic outcome  
444 in *PtHMGR*-and *PtDXR-OEs*, we discovered that the correlation might exist between MVA- and  
445 MEP-related genes with MVA- and MEP-derived products, which are not restricted to crosstalk  
446 between IPP and DMAPP (Figure 6).

447 On the one hand, overexpression of *PtDXR* affected the transcript levels of MEP-related  
448 genes and the contents of MEP-derived isoprenoids, including GAs and carotenoids. The  
449 diminished accumulation of MVA-related gene products causes a reduction in the yields of  
450 MVA-derived isoprenoids (including CS) but leads to increasing tZR, IPA, and DCS contents. We  
451 hypothesize that IPP and DMAPP produced by the MEP pathway could enter the cytoplasm to  
452 compensate for the lack of IPP and DMAPP, and the IPP and DMAPP as the precursors of the  
453 MVA pathway are used to guide the synthesis of MVA-derived products. On the other  
454 hand, *PtHMGR-OEs* exhibited higher transcript levels of *AACT*, *MVK*, and *MVD* and  
455 higher *DXS*, *DXR*, *HDS*, and *HDR* than NT poplars, resulting in effect both MEP- and MVA-  
456 related gene expressions. We successfully demonstrated that manipulation of *HMGR* in the  
457 poplar MVA pathway results in dramatically enhanced yields of GAs and carotenoids. This  
458 result illustrates that cytosolic *HMGR* overexpression expanded plastidial GPP- and GGPP-  
459 derived products, such as carotenoids. Therefore, this study provides hints that  
460 communications between the MVA- and MEP pathways increased the expression levels  
461 of *GPS* and *GPPS* in *PtHMGR-OEs*, and elevated the contents of GA3 and carotenoids.  
462 Moreover, changes in MEP- and MVA-related gene expressions affect MVA- and MEP-derived  
463 isoprenoids.

464 In conclusion, overexpression of *PtHMGR* in poplars caused the accumulation of MVA-  
465 derived isoprenoids and MEP-derived substances. The advanced insights into the regulation  
466 of MVA- and MEP pathways in poplar add to the knowledge about these pathways in  
467 Arabidopsis, tomato, and rice. In *PtHMGR-OE* poplars, most MEP- and MVA-related genes  
468 associated with the biosynthesis of isoprenoid precursors were upregulated. In *PtDXR*-  
469 *OE* poplars, elevated contents of GAs, carotenoids, and GRs were attributed to increased  
470 expression of MEP-related genes as well as plastidial *GPP* and *GGPP*. Together, these results  
471 show that manipulating *PtDXR* and *PtHMGR* is a novel strategy to influence poplar isoprenoids.

#### 472 4.7. *Communications between MVA- and MEP pathways affected by PtHMGR- and* 473 *PtDXR-OEs influence the plant growth and developments*

474 It has been shown that Abscisic acid (ABA) and GA3 perform essential functions in cell  
475 division, shoot growth, and flower induction (Xing et al., 2016). It has also been demonstrated  
476 that the cytokinin tZR, a variety of phytohormones, perform a crucial function as root to shoot



477 signals, directing numerous developmental and growth processes in shoots (Abul et al., 2010;  
478 Sakakibara, 2006). Regarding these findings, we showed how the communications between  
479 MVA- and MEP pathways and their changes affected by some stimulators (*HMGR*-and *DXR*-  
480 *OEs*) influenced plant growth, especially in stem length. Finally, We figured out that the  
481 gibberellic acid and cytokinin may be more effective in plant growth than inhibiting by ABA,  
482 causing higher *PtDXR-OEs* than *PtHMGR-OEs* compared with NT poplars.

#### 483 **Author contributions**

484 A.M. and H.W. conceived, planned, and coordinated the project, performed data analysis,  
485 wrote the draft, and finalized the manuscript. B.P. validated and contributed to data analysis  
486 and curation, revised and finalized the manuscript. T.J., W.S., and D.L. reviewed and edited the  
487 manuscript. L.Y. and Q.Z. coordinated, contributed to data curation, finalized and funded this  
488 research. A.M., H.W., and B.P. contributed equally as the first author.

#### 489 **Conflict of interest**

490 The authors declare that they have no conflict of interest.

#### 491 **Acknowledgments**

492 This work was supported by the National Key Program on Transgenic Research  
493 (2018ZX08020002), the National Natural Science Foundation of China (No. 31971682).

#### 494 **5. Reference**

- 495 Abul, Y., Menendez, V., Gomez-Campo, C., Revilla, M.A., Lafont, F., Fernandez, H., 2010. Occurrence of plant  
496 growth regulators in *Psilotum nudum*. *J Plant Physiol* 167, 1211-1213.
- 497 Aharoni, A., Giri, A.P., Deuerlein, S., Griepink, F., de Kogel, W.J., Verstappen, F.W., Verhoeven, H.A., Jongsma,  
498 M.A., Schwab, W., Bouwmeester, H.J., 2003. Terpenoid metabolism in wild-type and transgenic *Arabidopsis*  
499 plants. *Plant Cell* 15, 2866-2884.
- 500 Aharoni, A., Giri, A.P., Verstappen, F.W., Berteaux, C.M., Sevenier, R., Sun, Z., Jongsma, M.A., Schwab, W.,  
501 Bouwmeester, H.J., 2004. Gain and loss of fruit flavor compounds produced by wild and cultivated strawberry  
502 species. *Plant Cell* 16, 3110-3131.
- 503 Aharoni, A., Jongsma, M.A., Bouwmeester, H.J., 2005. Volatile science? Metabolic engineering of terpenoids in  
504 plants. *Trends Plant Sci* 10, 594-602.
- 505 Bohlmann, J., Keeling, C.I., 2008. Terpenoid biomaterials. *Plant J* 54, 656-669.
- 506 Boutte, Y., Grebe, M., 2009. Cellular processes relying on sterol function in plants. *Curr Opin Plant Biol* 12, 705-  
507 713.
- 508 Bouvier, F., Rahier, A., Camara, B., 2005. Biogenesis, molecular regulation and function of plant isoprenoids.  
509 *Prog Lipid Res* 44, 357-429.
- 510 Carretero-Paulet, L., Cairo, A., Botella-Pavia, P., Besumbes, O., Campos, N., Boronat, A., Rodriguez-Concepcion,  
511 M., 2006. Enhanced flux through the methylerythritol 4-phosphate pathway in *Arabidopsis* plants overexpressing  
512 deoxyxylulose 5-phosphate reductoisomerase. *Plant Mol Biol* 62, 683-695.

- 513 Cordoba, E., Salmi, M., Leon, P., 2009. Unravelling the regulatory mechanisms that modulate the MEP pathway  
514 in higher plants. *J Exp Bot* 60, 2933-2943.
- 515 Cowan, A.K., Moore-Gordon, C.S., Bertling, I., Wolstenholme, B.N., 1997. Metabolic Control of Avocado Fruit  
516 Growth (Isoprenoid Growth Regulators and the Reaction Catalyzed by 3-Hydroxy-3-Methylglutaryl Coenzyme  
517 A Reductase). *Plant Physiol* 114, 511-518.
- 518 Dai, Z., Cui, G., Zhou, S.F., Zhang, X., Huang, L., 2011. Cloning and characterization of a novel 3-hydroxy-3-  
519 methylglutaryl coenzyme A reductase gene from *Salvia miltiorrhiza* involved in diterpenoid tanshinone  
520 accumulation. *J Plant Physiol* 168, 148-157.
- 521 Devappa, R.K., Rakshit, S.K., Dekker, R.F., 2015. Forest biorefinery: Potential of poplar phytochemicals as  
522 value-added co-products. *Biotechnol Adv* 33, 681-716.
- 523 Dueber, J.E., Wu, G.C., Malmirchegini, G.R., Moon, T.S., Petzold, C.J., Ullal, A.V., Prather, K.L., Keasling, J.D.,  
524 2009. Synthetic protein scaffolds provide modular control over metabolic flux. *Nat Biotechnol* 27, 753-759.
- 525 Enfissi, E.M., Fraser, P.D., Lois, L.M., Boronat, A., Schuch, W., Bramley, P.M., 2005. Metabolic engineering of  
526 the mevalonate and non-mevalonate isopentenyl diphosphate-forming pathways for the production of health-  
527 promoting isoprenoids in tomato. *Plant Biotechnol J* 3, 17-27.
- 528 Esteban, R., Barrutia, O., Artetxe, U., Fernandez-Marin, B., Hernandez, A., Garcia-Plazaola, J.I., 2015. Internal  
529 and external factors affecting photosynthetic pigment composition in plants: a meta-analytical approach. *New*  
530 *Phytol* 206, 268-280.
- 531 Gershenzon, J., Dudareva, N., 2007. The function of terpene natural products in the natural world. *Nat Chem Biol*  
532 3, 408-414.
- 533 Ghirardo, A., Wright, L.P., Bi, Z., Rosenkranz, M., Pulido, P., Rodriguez-Concepcion, M., Niinemets, U.,  
534 Bruggemann, N., Gershenzon, J., Schnitzler, J.P., 2014. Metabolic flux analysis of plastidic isoprenoid  
535 biosynthesis in poplar leaves emitting and nonemitting isoprene. *Plant Physiol* 165, 37-51.
- 536 Gutensohn, M., Orlova, I., Nguyen, T.T., Davidovich-Rikanati, R., Ferruzzi, M.G., Sitrit, Y., Lewinsohn, E.,  
537 Pichersky, E., Dudareva, N., 2013. Cytosolic monoterpene biosynthesis is supported by plastid-generated geranyl  
538 diphosphate substrate in transgenic tomato fruits. *Plant J* 75, 351-363.
- 539 Hain, R., Reif, H.J., Krause, E., Langebartels, R., Kindl, H., Vornam, B., Wiese, W., Schmelzer, E., Schreier, P.H.,  
540 Stocker, R.H., et al., 1993. Disease resistance results from foreign phytoalexin expression in a novel plant. *Nature*  
541 361, 153-156.
- 542 Hasunuma, T., Takeno, S., Hayashi, S., Sendai, M., Bamba, T., Yoshimura, S., Tomizawa, K., Fukusaki, E.,  
543 Miyake, C., 2008. Overexpression of 1-Deoxy-D-xylulose-5-phosphate reductoisomerase gene in chloroplast  
544 contributes to increment of isoprenoid production. *J Biosci Bioeng* 105, 518-526.
- 545 Hemmerlin, A., Harwood, J. L., & Bach, T. J., 2012. A raison d'être for two distinct pathways in the early steps  
546 of plant isoprenoid biosynthesis? *Prog. Lipid Res.* 51, 95-148.
- 547 Henriquez, M.A., Soliman, A., Li, G., Hannoufa, A., Ayele, B.T., Daayf, F., 2016. Molecular cloning, functional  
548 characterization and expression of potato (*Solanum tuberosum*) 1-deoxy-d-xylulose 5-phosphate synthase 1  
549 (StDXS1) in response to *Phytophthora infestans*. *Plant Sci* 243, 71-83.
- 550 Henry, L.K., Gutensohn, M., Thomas, S.T., Noel, J.P., Dudareva, N., 2015. Orthologs of the archaeal isopentenyl  
551 phosphate kinase regulate terpenoid production in plants. *Proc Natl Acad Sci U S A* 112, 10050-10055.
- 552 Huchelmann, A., Gastaldo, C., Veinante, M., Zeng, Y., Heintz, D., Tritsch, D., Schaller, H., Rohmer, M., Bach,  
553 T.J., Hemmerlin, A., 2014. S-carvone suppresses cellulase-induced capsidiol production in *Nicotiana tabacum* by  
554 interfering with protein isoprenylation. *Plant Physiol* 164, 935-950.
- 555 Kai, G., Xu, H., Zhou, C., Liao, P., Xiao, J., Luo, X., You, L., Zhang, L., 2011. Metabolic engineering tanshinone  
556 biosynthetic pathway in *Salvia miltiorrhiza* hairy root cultures. *Metab Eng* 13, 319-327.
- 557 Kang, S.M., Min, J.Y., Kim, Y.D., Karigar, C.S., Kim, S.W., Goo, G.H., Choi, M.S., 2009. Effect of biotic elicitors  
558 on the accumulation of bilobalide and ginkgolides in *Ginkgo biloba* cell cultures. *J Biotechnol* 139, 84-88.
- 559 Kim, M.J., Noh, M.H., Woo, S., Lim, H.G., Jung, G.Y., 2019. Enhanced Lycopene Production in *Escherichia coli*

- 560 by Expression of Two MEP Pathway Enzymes from *Vibrio* sp. *Dhg. Catalysts* 9.
- 561 Kim, M.S., Haney, M.J., Zhao, Y., Mahajan, V., Deygen, I., Klyachko, N.L., Inskoe, E., Piroyan, A., Sokolsky, M.,  
562 Okolie, O., Hingtgen, S.D., Kabanov, A.V., Batrakova, E.V., 2016a. Development of exosome-encapsulated  
563 paclitaxel to overcome MDR in cancer cells. *Nanomedicine* 12, 655-664.
- 564 Kim, S.K., Han, G.H., Seong, W., Kim, H., Kim, S.W., Lee, D.H., Lee, S.G., 2016b. CRISPR interference-guided  
565 balancing of a biosynthetic mevalonate pathway increases terpenoid production. *Metab Eng* 38, 228-240.
- 566 Kim, Y.J., Lee, O. R., Ji, Y. O., Jang, M. G., & Yang, D. C., 2014. Functional analysis of HMGR encoding genes  
567 in triterpene saponin-producing *Panax ginseng* Meyer. *Plant Physiol* 165, 373–387.
- 568 Kirby, J., Keasling, J.D., 2009. Biosynthesis of plant isoprenoids: perspectives for microbial engineering. *Annu*  
569 *Rev Plant Biol* 60, 335-355.
- 570 Kong, L.Y., Tan, R.X., 2015. Artemisinin, a miracle of traditional Chinese medicine. *Nat Prod Rep* 32, 1617-1621.
- 571 Laule, O., Fürholz, A., Chang, H. S., Zhu, T., Wang, X., Heifetz, P. B., ... & Lange, M., 2003. Cross-talk between  
572 cytosolic and plastidial pathways of isoprenoid biosynthesis in *Arabidopsis thaliana*. *Proc. Natl. Acad. Sci. U. S.*  
573 *A.*, 6866–6871.
- 574 Liao, P., Chen, X., Wang, M., Bach, T.J., Chye, M.L., 2018. Improved fruit alpha-tocopherol, carotenoid, squalene  
575 and phytosterol contents through manipulation of *Brassica juncea* 3-HYDROXY-3-METHYLGLUTARYL-COA  
576 SYNTHASE1 in transgenic tomato. *Plant Biotechnol J* 16, 784-796.
- 577 Liao, P., Hemmerlin, A., Bach, T.J., Chye, M.L., 2016. The potential of the mevalonate pathway for enhanced  
578 isoprenoid production. *Biotechnol Adv* 34, 697-713.
- 579 Liao, Z.H., Chen, M., Gong, Y. F., Miao, Z. Q., Sun, X. F., & Tang, K. X., 2006. Isoprenoid biosynthesis in plants:  
580 pathways, genes, regulation and metabolic engineering. *J Biol Sci* 6, 209–219.
- 581 Lu, X., Tang, K., Li, P., 2016. Plant Metabolic Engineering Strategies for the Production of Pharmaceutical  
582 Terpenoids. *Front Plant Sci* 7, 1647.
- 583 Lu, X.M., Hu, X.J., Zhao, Y.Z., Song, W.B., Zhang, M., Chen, Z.L., Chen, W., Dong, Y.B., Wang, Z.H., Lai, J.S.,  
584 2012. Map-based cloning of *zb7* encoding an IPP and DMAPP synthase in the MEP pathway of maize. *Mol Plant*  
585 *5*, 1100-1112.
- 586 Ma, D., Li, G., Zhu, Y., Xie, D.Y., 2017. Overexpression and Suppression of *Artemisia annua* 4-Hydroxy-3-  
587 Methylbut-2-enyl Diphosphate Reductase 1 Gene (*AaHDR1*) Differentially Regulate Artemisinin and Terpenoid  
588 Biosynthesis. *Front Plant Sci* 8, 77.
- 589 Ma, Y., Yuan, L., Wu, B., Li, X., Chen, S., Lu, S., 2012. Genome-wide identification and characterization of novel  
590 genes involved in terpenoid biosynthesis in *Salvia miltiorrhiza*. *J Exp Bot* 63, 2809-2823.
- 591 Mahmoud, S.S., Croteau, R.B., 2001. Metabolic engineering of essential oil yield and composition in mint by  
592 altering expression of deoxyxylulose phosphate reductoisomerase and menthofuran synthase. *Proc Natl Acad Sci*  
593 *U S A* 98, 8915-8920.
- 594 Mahmoud, S.S., Croteau, R.B., 2002. Strategies for transgenic manipulation of monoterpene biosynthesis in plants.  
595 *Trends Plant Sci* 7, 366-373.
- 596 Malkin R, a.N.K., 2000. Photosynthesis. American Society of Plant Physiologists, Rockville.
- 597 Maurey, K., Wolf, F., Golbeck, J., 1986. 3-Hydroxy-3-Methylglutaryl Coenzyme A Reductase Activity in  
598 *Ochromonas malhamensis*: A System to Study the Relationship between Enzyme Activity and Rate of Steroid  
599 Biosynthesis. *Plant Physiol* 82, 523-527.
- 600 Morrone, D., Lowry, L., Determan, M.K., Hershey, D.M., Xu, M., Peters, R.J., 2010. Increasing diterpene yield  
601 with a modular metabolic engineering system in *E. coli*: comparison of MEV and MEP isoprenoid precursor  
602 pathway engineering. *Appl Microbiol Biotechnol* 85, 1893-1906.
- 603 Movahedi, A., Zhang, J., Amirian, R., Zhuge, Q., 2014. An efficient *Agrobacterium*-mediated transformation  
604 system for poplar. *Int J Mol Sci* 15, 10780-10793.
- 605 Movahedi, A., Zhang, J., Sun, W., Mohammadi, K., Almasi Zadeh Yaghtuti, A., Wei, H., Wu, X., Yin, T., Zhuge,  
606 Q., 2018. Functional analyses of *PtRDM1* gene overexpression in poplars and evaluation of its effect on DNA

- 607 methylation and response to salt stress. *Plant Physiol Biochem* 127, 64-73.
- 608 Movahedi, A., Zhang, J.X., Yin, T.M., Qiang, Z.G., 2015. Functional Analysis of Two Orthologous NAC Genes,  
609 CarNAC3, and CarNAC6 from *Cicer arietinum*, Involved in Abiotic Stresses in Poplar. *Plant Molecular Biology*  
610 *Reporter* 33, 1539-1551.
- 611 Munoz-Bertomeu, J., Sales, E., Ros, R., Arrillaga, I., Segura, J., 2007. Up-regulation of an N-terminal truncated  
612 3-hydroxy-3-methylglutaryl CoA reductase enhances production of essential oils and sterols in transgenic  
613 *Lavandula latifolia*. *Plant Biotechnol J* 5, 746-758.
- 614 Opitz, S., Nes, W.D., Gershenzon, J., 2014. Both methylerythritol phosphate and mevalonate pathways contribute  
615 to biosynthesis of each of the major isoprenoid classes in young cotton seedlings. *Phytochemistry* 98, 110-119.
- 616 Perreca, E., Rohwer, J., Gonzalez-Cabanelas, D., Loreto, F., Schmidt, A., Gershenzon, J., Wright, L.P., 2020.  
617 Effect of Drought on the Methylerythritol 4-Phosphate (MEP) Pathway in the Isoprene Emitting Conifer *Picea*  
618 *glauca*. *Front Plant Sci* 11, 546295.
- 619 Rahman, L., Kouno, H., Hashiguchi, Y., Yamamoto, H., Narbad, A., Parr, A., Walton, N., Ikenaga, T., Kitamura,  
620 Y., 2009. HCHL expression in hairy roots of *Beta vulgaris* yields a high accumulation of p-hydroxybenzoic acid  
621 (pHBA) glucose ester, and linkage of pHBA into cell walls. *Bioresour Technol* 100, 4836-4842.
- 622 Ren, D., Liu, Y., Yang, K.Y., Han, L., Mao, G., Glazebrook, J., Zhang, S., 2008. A fungal-responsive MAPK  
623 cascade regulates phytoalexin biosynthesis in *Arabidopsis*. *Proc Natl Acad Sci U S A* 105, 5638-5643.
- 624 Roberts, S.C., 2007. Production and engineering of terpenoids in plant cell culture. *Nat Chem Biol* 3, 387-395.
- 625 Rodriguez-Concepcion, M., 2010. Supply of precursors for carotenoid biosynthesis in plants. *Arch Biochem*  
626 *Biophys* 504, 118-122.
- 627 Russell, D.W., Davidson, H., 1982. Regulation of cytosolic HMG-CoA reductase activity in pea seedlings:  
628 contrasting responses to different hormones, and hormone-product interaction, suggest hormonal modulation of  
629 activity. *Biochem Biophys Res Commun* 104, 1537-1543.
- 630 Sakakibara, H., 2006. Cytokinins: activity, biosynthesis, and translocation. *Annu Rev Plant Biol* 57, 431-449.
- 631 Schaller, H., Grausem, B., Benveniste, P., Chye, M.L., Tan, C.T., Song, Y.H., Chua, N.H., 1995. Expression of the  
632 *Hevea brasiliensis* (H.B.K.) Mull. Arg. 3-Hydroxy-3-Methylglutaryl-Coenzyme A Reductase 1 in Tobacco Results  
633 in Sterol Overproduction. *Plant Physiol* 109, 761-770.
- 634 Simpson, K., Quiroz, L.F., Rodriguez-Concepcion, M., Stange, C.R., 2016. Differential Contribution of the First  
635 Two Enzymes of the MEP Pathway to the Supply of Metabolic Precursors for Carotenoid and Chlorophyll  
636 Biosynthesis in Carrot (*Daucus carota*). *Front Plant Sci* 7, 1344.
- 637 Song, X., Yu, X., Hori, C., Demura, T., Ohtani, M., Zhuge, Q., 2016. Heterologous Overexpression of Poplar  
638 SnRK2 Genes Enhanced Salt Stress Tolerance in *Arabidopsis thaliana*. *Front Plant Sci* 7, 612.
- 639 Takahashi, S., Kuzuyama, T., Watanabe, H., Seto, H., 1998. A 1-deoxy-D-xylulose 5-phosphate reductoisomerase  
640 catalyzing the formation of 2-C-methyl-D-erythritol 4-phosphate in an alternative nonmevalonate pathway for  
641 terpenoid biosynthesis. *Proc Natl Acad Sci U S A* 95, 9879-9884.
- 642 Thulasiram, H.V., Erickson, H.K., Poulter, C.D., 2007. Chimeras of two isoprenoid synthases catalyze all four  
643 coupling reactions in isoprenoid biosynthesis. *Science* 316, 73-76.
- 644 Tong, Y., Su, P., Zhao, Y., Zhang, M., Wang, X., Liu, Y., Zhang, X., Gao, W., Huang, L., 2015. Molecular Cloning  
645 and Characterization of DXS and DXR Genes in the Terpenoid Biosynthetic Pathway of *Tripterygium wilfordii*.  
646 *Int J Mol Sci* 16, 25516-25535.
- 647 Vaccaro, M., Malafrente, N., Alfieri, M., De Tommasi, N., Leone, A., 2014. Enhanced biosynthesis of bioactive  
648 abietane diterpenes by overexpressing AtDXS or AtDXR genes in *Salvia sclarea* hairy roots. *Plant Cell Tissue and*  
649 *Organ Culture* 119, 65-77.
- 650 van Schie, C.C., Haring, M.A., Schuurink, R.C., 2006. Regulation of terpenoid and benzenoid production in  
651 flowers. *Curr Opin Plant Biol* 9, 203-208.
- 652 Wang, H., Nagegowda, D.A., Rawat, R., Bouvier-Nave, P., Guo, D., Bach, T.J., Chye, M.L., 2012. Overexpression  
653 of *Brassica juncea* wild-type and mutant HMG-CoA synthase 1 in *Arabidopsis* up-regulates genes in sterol

654 biosynthesis and enhances sterol production and stress tolerance. *Plant Biotechnol J* 10, 31-42.  
655 Wei, Y., Mohsin, A., Hong, Q., Guo, M., Fang, H., 2018. Enhanced production of biosynthesized lycopene via  
656 heterogenous MVA pathway based on chromosomal multiple position integration strategy plus plasmid systems  
657 in *Escherichia coli*. *Bioresour Technol* 250, 382-389.  
658 Wille, A., Zimmermann, P., Vranova, E., Furholz, A., Laule, O., Bleuler, S., Hennig, L., Prelic, A., von Rohr, P.,  
659 Thiele, L., Zitzler, E., Gruissem, W., Buhmann, P., 2004. Sparse graphical Gaussian modeling of the isoprenoid  
660 gene network in *Arabidopsis thaliana*. *Genome Biol* 5, R92.  
661 Wright, L.P., Rohwer, J.M., Ghirardo, A., Hammerbacher, A., Ortiz-Alcaide, M., Raguschke, B., Schnitzler, J.P.,  
662 Gershenzon, J., Phillips, M.A., 2014. Deoxyxylulose 5-Phosphate Synthase Controls Flux through the  
663 Methylerythritol 4-Phosphate Pathway in *Arabidopsis*. *Plant Physiol* 165, 1488-1504.  
664 Xie, Z., Kapteyn, J., Gang, D.R., 2008. A systems biology investigation of the MEP/terpenoid and  
665 shikimate/phenylpropanoid pathways points to multiple levels of metabolic control in sweet basil glandular  
666 trichomes. *Plant J* 54, 349-361.  
667 Xing, L., Zhang, D., Zhao, C., Li, Y., Ma, J., An, N., Han, M., 2016. Shoot bending promotes flower bud formation  
668 by miRNA-mediated regulation in apple (*Malus domestica* Borkh.). *Plant Biotechnol J* 14, 749-770.  
669 Xing, S., Miao, J., Li, S., Qin, G., Tang, S., Li, H., Gu, H., Qu, L.J., 2010. Disruption of the 1-deoxy-D-xylulose-  
670 5-phosphate reductoisomerase (DXR) gene results in albino, dwarf and defects in trichome initiation and stomata  
671 closure in *Arabidopsis*. *Cell Res* 20, 688-700.  
672 Xu, C., Wei, H., Movahedi, A., Sun, W., Ma, X., Li, D., Yin, T., Zhuge, Q., 2019. Evaluation, characterization,  
673 expression profiling, and functional analysis of DXS and DXR genes of *Populus trichocarpa*. *Plant Physiol*  
674 *Biochem* 142, 94-105.  
675 Xu, J.W., Xu, Y.N., Zhong, J.J., 2012. Enhancement of ganoderic acid accumulation by overexpression of an N-  
676 terminally truncated 3-hydroxy-3-methylglutaryl coenzyme A reductase gene in the basidiomycete *Ganoderma*  
677 *lucidum*. *Appl Environ Microbiol* 78, 7968-7976.  
678 Yamaguchi, S., Kamiya, Y., & Nambara, E., 2018. Regulation of ABA and GA levels during seed development  
679 and germination in *Arabidopsis*. *Annu Plant Rev* 27, 224-247.  
680 Yang, J., Guo, L., 2014. Biosynthesis of  $\beta$ -carotene in engineered *E. coli* using the MEP and MVA pathways.  
681 *Microb Cell Fact*, 160.  
682 Zhang, H., Niu, D., Wang, J., Zhang, S., Yang, Y., Jia, H., Cui, H., 2015. Engineering a Platform for Photosynthetic  
683 Pigment, Hormone and Cembrane-Related Diterpenoid Production in *Nicotiana tabacum*. *Plant Cell Physiol* 56,  
684 2125-2138.  
685 Zhang, J., Li, J., Liu, B., Zhang, L., Chen, J., Lu, M., 2013. Genome-wide analysis of the *Populus Hsp90* gene  
686 family reveals differential expression patterns, localization, and heat stress responses. *BMC Genomics* 14, 532.  
687 Zhang, K.K., Fan, W., Huang, Z.W., Chen, D.F., Yao, Z.W., Li, Y.F., Yang, Y.F., Qiu, D.Y., 2019. Transcriptome  
688 analysis identifies novel responses and potential regulatory genes involved in 12-deoxyphorbol-13-phenylacetate  
689 biosynthesis of *Euphorbia resinifera*. *Industrial Crops and Products* 135, 138-145.  
690 Zhang, L., Ding, R., Chai, Y., Bonfill, M., Moyano, E., Oksman-Caldentey, K.M., Xu, T., Pi, Y., Wang, Z., Zhang,  
691 H., Kai, G., Liao, Z., Sun, X., Tang, K., 2004. Engineering tropene biosynthetic pathway in *Hyoscyamus niger*  
692 hairy root cultures. *Proc Natl Acad Sci U S A* 101, 6786-6791.  
693 Zhang, Y., Zhao, Y., Wang, J., Hu, T., Tong, Y., Zhou, J., Song, Y., Gao, W., Huang, L., 2018. Overexpression and  
694 RNA interference of TwDXR regulate the accumulation of terpenoid active ingredients in *Tripterygium wilfordii*.  
695 *Biotechnol Lett* 40, 419-425.  
696

## 697 **6. Figure legends**

698 **Figure 1 | MVA- and MEP-related genes analyses in overexpressed *PtHMGR*- and *PtDXR-OE***  
699 **s poplars. a**, Mean comparison of relative expression of MVA-related genes *AACT*,  
700 *HMGS*, *MVK*, *MVD*, and *FPS* (Indicated in red) affected by *PtHMGR* overexpressing. **b**, Mean  
701 comparison of relative expression of MEP-related genes *DXS*, *MCT*, *CMK*, *HDS*, *HDR*, *IDI*, *GPS*,  
702 and *GPPS* (Indicated in red) affected by *PtHMGR* overexpressing. *HMGR* and *DXR*, which were  
703 overexpressed respectively among *DXR*- and *HMGR-OEs*, were presented in Supplementary  
704 Figure 4. *PtActin* was used as an internal reference in all repeats; “ns” means not significant,  
705 \*  $P < 0.05$ , \*\*  $P < 0.01$ , \*\*\*  $P < 0.001$ , \*\*\*\*  $P < 0.0001$ ; Three independent replications were p  
706 erformed in this experiment.

707 **Figure 2 | HPLC-MS/MS content analyses of lycopene,  $\beta$ -carotene, Lutein, and real-time PCR**  
708 **of *ZEP* and *NCED* genes family.** HPLC-MS/MS content analyses have been performed to show  
709 the effect of *PtHMGR-OEs* on **a**, lycopene **b**,  $\beta$ -carotene, and **c**, lutein. Relative expressions  
710 have been analyzed affected by *PtHMGR-OEs* compared with NT poplars of **d**, *ZEP*,  
711 and **e**, *NCED* genes family. Bars represent mean  $\pm$  SD ( $n = 3$ ); Stars reveal significant differences,  
712 \*  $P < 0.05$ , \*\*  $P < 0.01$ , \*\*\*  $P < 0.001$ , \*\*\*\*  $P < 0.0001$ ; Three independent experiments were  
713 performed in these analyses.

714 **Figure 3 | HPLC-MS/MS content analyses of lycopene,  $\beta$ -carotene, Lutein, and real-time PCR**  
715 **of *ZEP* and *NCED* genes family.** HPLC-MS/MS content analyses have been performed to show  
716 the effect of *PtDXR-OEs* on **a**, lycopene **b**,  $\beta$ -carotene, and **c**, lutein. Relative expressions have  
717 been analyzed affected by *PtDXR-OEs* compared with NT poplars of **d**, *ZEP*, and **e**, *NCED* genes  
718 family. Bars represent mean  $\pm$  SD ( $n = 3$ ); Stars reveal significant differences, \*  $P < 0.05$ , \*\*  $P <$   
719  $0.01$ , \*\*\*  $P < 0.001$ , \*\*\*\*  $P < 0.0001$ ; Three independent experiments were performed in these  
720 analyses.

721 **Figure 4 | HPLC-MS/MS content analyses of MEP- and MVA-derived isoprenoids. a,b,c,d,**  
722 **and e**, Violin plots reveal the contents of isoprenoids GA3, tZR, IPA, DCS, and CS obtained from  
723 MEP- and MVA pathways influenced by *PtHMGR*- and *PtDXR-OEs*. **f,g,h,i, and j**, the column  
724 plots reveal the effect of *PtHMGR-OE3* and *-7* and *PtDXR-OE1* and *-3* on the mentioned above  
725 isoprenoids separately; NT poplars have been used as the control. Bars represent mean  $\pm$  SD  
726 ( $n = 3$ ); Stars reveal significant differences, \*  $P < 0.05$ , \*\*  $P < 0.01$ , \*\*\*  $P < 0.001$ , \*\*\*\*  $P <$

727 0.0001. k,l,m,n, and o, represent the HPLC-MS/MS chromatogram content analyses of GA<sub>3</sub>,  
728 tZR, IPA, DCS, and CS, respectively affected by *PtHMGR*- and *PtDXR*-*OEs* compared with NT  
729 poplars.

730 **Figure 5 | Phenotypic changes resulted by affected communications of MVA- and MEP**  
731 **pathways amongst *PtHMGR*- and *PtDXR*-*OEs* in 45-day-old poplars.** a(I), The *PtDXR*  
732 transgenic revealed a higher stem length than *PtHMGR*-*OEs* and NT poplars. a(II), The *PtHMGR*  
733 transgenic presents an insignificantly more stem development than NT poplar. a(III), NT poplar  
734 was used as a control; Scale bar represents 1 cm. **b**, The Box and Whisker mean comparison  
735 plot of stem lengths revealed significantly higher lengths *PtDXR*-*OEs* than NT poplars  
736 compared with *PtHMGR*-*OEs*. *PtHMGR* transgenics also revealed significantly higher lengths  
737 than NT poplars. **c** and **d**, The Violin mean comparison plots of *ZEP* and *NCED* relative  
738 expressions between *PtHMGR*- and *PtDXR*-*OEs* compared to NT poplars. **e**, The Box and  
739 Whisker mean comparison plot of stem diameters revealed less significant differences  
740 between *PtDXR*-*OEs* and NT poplars. Stars reveal significant differences, \**P* < 0.05, \*\**P* < 0.01,  
741 \*\*\**P* < 0.001, \*\*\*\**P* < 0.0001.

742 **Figure 6 | Communications exist between MVA- and MEP-pathways excess of IPP and**  
743 **DMAPP.** The IPP and DMAPP are considered the common precursors of the MEP- and MVA  
744 pathways between cytoplasm and plastid. In addition, the putative communication generated  
745 between MVA- and MEP-related genes and MVA- and MEP-derived products. MVA: mevalonic  
746 acid, MEP: methylerythritol phosphate, IPP: isopentenyl diphosphate, DMAPP: dimethylallyl  
747 diphosphate, AACT: acetoacetyl CoA thiolase, HMGS: 3-hydroxy-3-methylglutaryl-CoA  
748 synthase, HMG-CoA: 3-hydroxy-3-methylglutaryl-CoA, HMGR: 3-hydroxy-3-methylglutaryl-  
749 CoA reductase, MVK: mevalonate kinase, MVD: mevalonate5-diphosphate decarboxylase, IPP:  
750 isopentenyl diphosphate, IDI: IPP isomerase, GPP: geranyldiphosphate, FPP:  
751 famesyldiphosphate, GPS: geranyl phosphate synthase, FPS: farnesyl-diphosphate synthase,  
752 GPPS: geranyl diphosphate synthase, GGPPS: geranyl geranyl diphosphate synthase, DXS: 1-  
753 deoxy-D-xylulose5-phosphate synthase, DXP: 1-deoxy-D-xylulose5-phosphate, DXR: 1-deoxy-  
754 D-xylulose5-phosphate reductoisomerase, HDS: 1-hydroxy-2-methyl-2-(E)-butenyl4-  
755 diphosphate synthase, HDR: 1-hydroxy-2-methyl-2-(E)-butenyl4-diphosphate reductase, MCT:  
756 MEP cytidyltransferase, CMK: 4-diphosphocytidyl-2-C-methyl-D-erythritol kinase.

757 **Supplementary figures and table**

758 **Supplementary Figure 1 | Amino acid sequences alignment of PtHMGR protein and other**  
759 **known HMGR proteins.** *A. thaliana* (NP\_177775.2), *G. hirsutum* (XP\_016691783.1), *M.*  
760 *domestica* (XP\_008348952.1), *M. esculenta* (XP\_021608133.1), *P. persica* (XM\_020569919.1),  
761 *O. sativa* (XM\_015768351.2), *T. cacao* (XM\_007043046.2), *Z. mays* (PWZ28886.1). The HMGR-  
762 CoA and NADPH binding domains are indicated in red rectangular.

763 **Supplementary Figure 2 | Construction of a phylogenetic tree based on the HMGR**  
764 **sequences of various species.** Accession numbers of the HMGR obtained from Phytozome are  
765 as follows: *A. thaliana* (AT1G76490 and AT2G17370) , *P. trichocarpa* (Potri.011G145000,  
766 Potri.005G257000, Potri.004G208500, Potri.001G457000, Potri.009G169900 and  
767 Potri.002G004000), *Gossypium raimondii* (Gorai.008G013000, Gorai.002G146000,  
768 Gorai.002G014700, Gorai.005G215800, Gorai.012G138100, Gorai.005G215500,  
769 Gorai.005G215600 and Gorai.005G215700), *Malus domestica* (MDP0000157996,  
770 MDP0000268909, MDP0000372490, MDP0000251253 and MDP0000312032), *Manihot*  
771 *esculenta* (Manes.15G114100, Manes.01G157500, Manes.03G096600, Manes.02G116900  
772 and Manes.05G128600), *Oryza sativa* (LOC\_Os09g31970, LOC\_Os08g40180 and  
773 LOC\_Os02g48330), *Prunus persica* (Prupe.7G187000, Prupe.7G187500 and Prupe.8G182300),  
774 *Theobroma cacao* (Thecc1EG000025, Thecc1EG007601 and Thecc1EG034814), and *Zea mays*  
775 (GRMZM2G393337, GRMZM2G058095, GRMZM2G136465, GRMZM2G001645 and  
776 GRMZM2G043503).

777 **Supplementary Figure 3 | Molecular identification of PtHMGR-OEs.** (A) PCR identification of  
778 *PtHMGR* in *PtHMGR-OEs* and NT poplars. Lane M: 15K molecular mass marker (TransGen,  
779 China); lane 1: genome DNA from WT as negative control; lanes 2–9: genome DNA from  
780 *PtHMGR-OE* lines (B) qRT-PCR identification of the transcript levels of *PtHMGR* in *PtHMGR-*  
781 *OEs* and NT poplars. Three independent experiments were performed; Stars reveal significant  
782 differences, \* P < 0.05, \*\* P < 0.01, \*\*\* P < 0.001.

783 **Supplementary Figure 4 | MEP- and MVA-related genes analyses in overexpressed PtHMG**  
784 **R- and PtDXR-OEs poplars.** a, MVA-related genes *AACT*, *HMGS*, *MVK*, *MVD*, and *FPS* affected b  
785 y *PtHMGR* overexpressing. b, MVA-related genes *AACT*, *HMGS*, *HMGR*, *MVK*, *MVD*, and *FPS* a  
786 ffected by *PtDXR* overexpressing. c, MEP-related genes *DXS*, *MCT*, *CMK*, *HDS*, *HDR*, *IDI*, *GPS*, *G*  
787 *PPS*, and *DXR* affected by *PtHMGR* overexpressing. d, MEP-related genes *DXS*, *DXR*, *MCT*, *CM*  
788 *K*, *HDS*, *HDR*, *IDI*, *GPS*, and *GPPS* affected by *PtDXR* overexpressing. *PtActin* was used as an in



789 ternal reference in all repeats; \*  $P < 0.05$ , \*\*  $P < 0.01$ , \*\*\* $P < 0.001$ , \*\*\*\* $P < 0.0001$ ; Three in  
790 dependent replications were performed in this experiment.

791 **Supplementary Figure 5** | HPLC chromatograms of analyzing the contents of **(A)**  $\beta$ -carotene,  
792 **(B)** lycopene, and **(C)** lutein in NT poplars and *PtHMGR-OEs*.

793 **Supplementary Figure 6** | HPLC chromatograms of analyzing the contents of **(A)**  $\beta$ -carotene,  
794 **(B)** lycopene, and **(C)** lutein in NT poplars and *PtDXR-OEs*.

795 **Supplementary Figure 7** | **Chromatogram analyses of GA3 standards via HPLC-MS/MS.** The  
796 chromatogram of standard GA3 at **(A)** 0.1, **(B)** 0.2, **(C)** 0.5, **(D)** 2, **(E)** 5, **(F)** 20, **(G)** 50, and **(H)**  
797 200 ng/mL concentrations. **(I)** Equations for the GA3 standard curves.

798 **Supplementary Figure 8** | **Chromatogram analyses of tZR standards via HPLC-MS/MS.** The  
799 chromatogram of standard tZR at **(A)** 0.1, **(B)** 0.2, **(C)** 0.5, **(D)** 2, **(E)** 5, **(F)** 20, **(G)** 50, and **(H)**  
800 200 ng/mL concentrations. **(I)** Equations for the tZR standard curves.

801 **Supplementary Figure 9** | **Chromatogram analyses of IPA standards via HPLC-MS/MS.** The  
802 chromatogram of standard IPA at **(A)** 0.2, **(B)** 0.5, **(C)** 2, **(D)** 5, **(E)** 20, **(F)** 50, and **(G)** 200 ng/mL  
803 concentrations. **(H)** Equations for the IPA standard curves.

804 **Supplementary Figure 10** | **Chromatogram analyses of DCS standards via HPLC-MS/MS.** The  
805 chromatogram of standard DCS at **(A)** 0.5, **(B)** 2, **(C)** 10, **(D)** 20, and **(E)** 50 ng/mL concentrations.  
806 **(F)** Equations for the DCS standard curves.

807 **Supplementary Figure 11** | **Chromatogram analyses of CS standards via HPLC-MS/MS.** The  
808 chromatogram of standard CS at **(A)** 0.5, **(B)** 5, **(C)** 10, **(D)** 20, and **(E)** 50 ng/mL concentrations.  
809 **(F)** Equations for the CS standard curves.

810 **Supplementary Table 1** | Primers were used in this study.

811 **Supplementary Table 2** | Table of data analyses used in phenotypic changes evaluation. **a**,  
812 Stem diameter data analyses. **b**, Stem length data analyses.

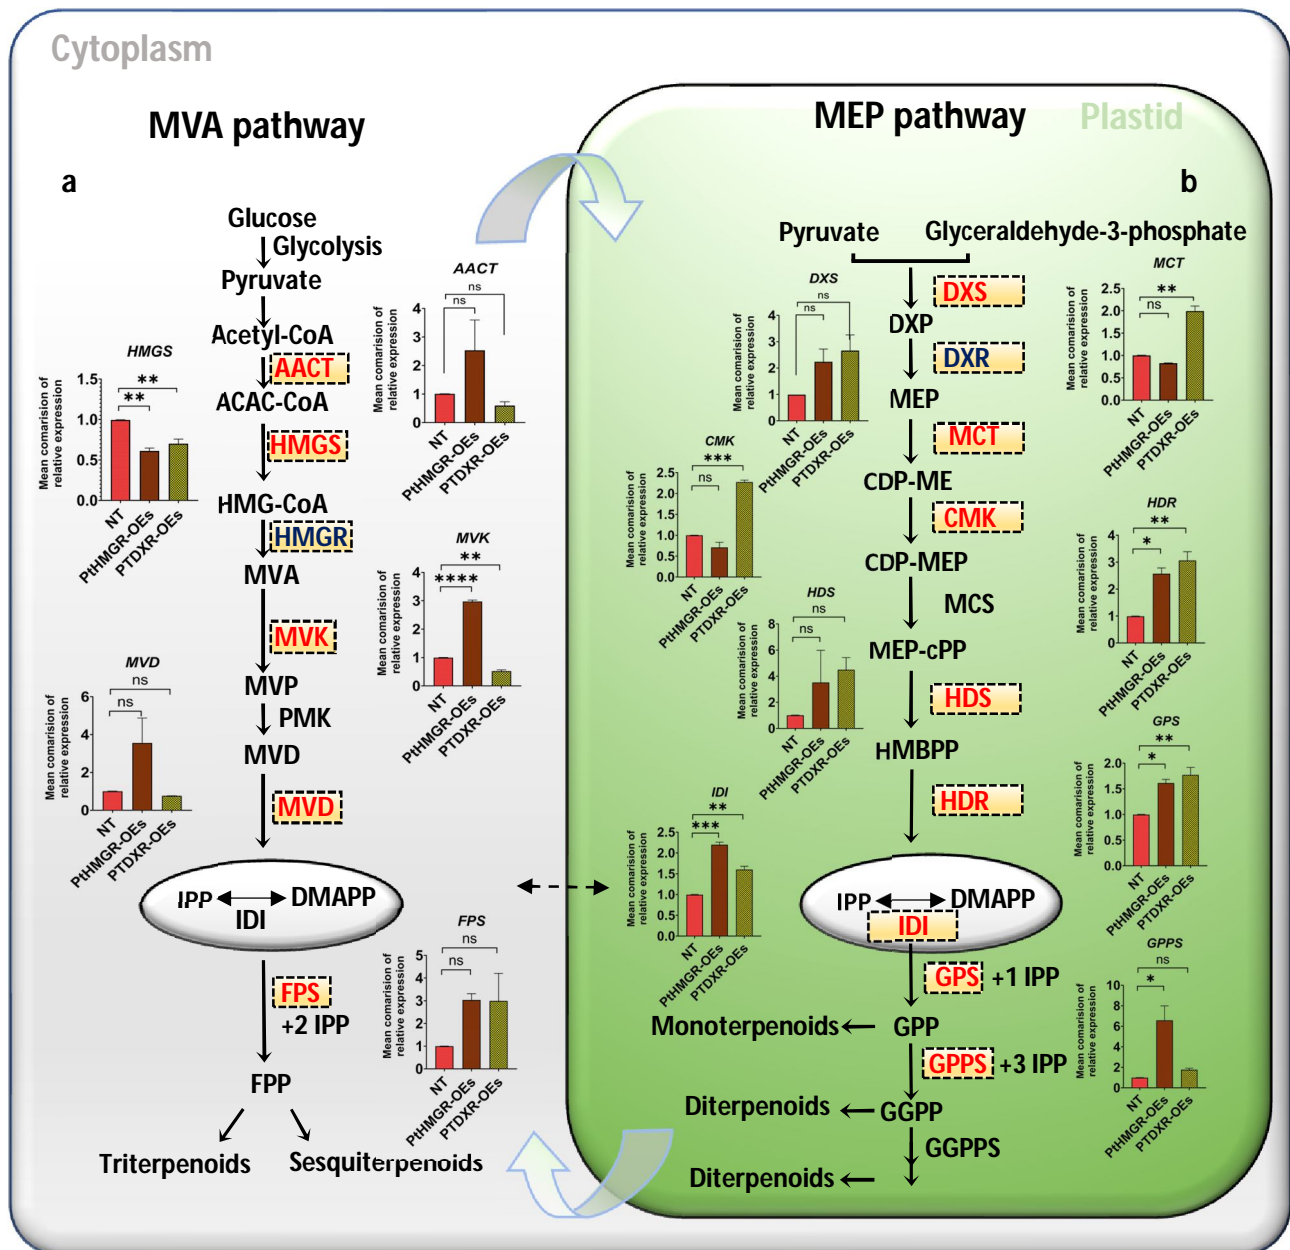

**Figure 1 | MVA- and MEP-related genes analyses in overexpressed *PtHMGR*- and *PtDXR*-OEs poplars. a**, Mean comparison of relative expression of MVA-related genes *AACT*, *HMGS*, *MVK*, *MVD*, and *FPS* (Indicated in red) affected by *PtHMGR* overexpressing. **b**, Mean comparison of relative expression of MEP-related genes *DXS*, *MCT*, *CMK*, *HDS*, *HDR*, *IDI*, *GPS*, and *GPPS* (Indicated in red) affected by *PtHMGR* overexpressing; *HMGR* and *DXR*, which were overexpressed respectively by *DXR*- and *HMGR*-OEs, were presented in Supplementary Figure 4. *PtActin* was used as an internal reference in all repeats; “ns” means not significant, \*  $P < 0.05$ , \*\*  $P < 0.01$ , \*\*\*  $P < 0.001$ , \*\*\*\*  $P < 0.0001$ ; Three independent replications were performed in this experiment.

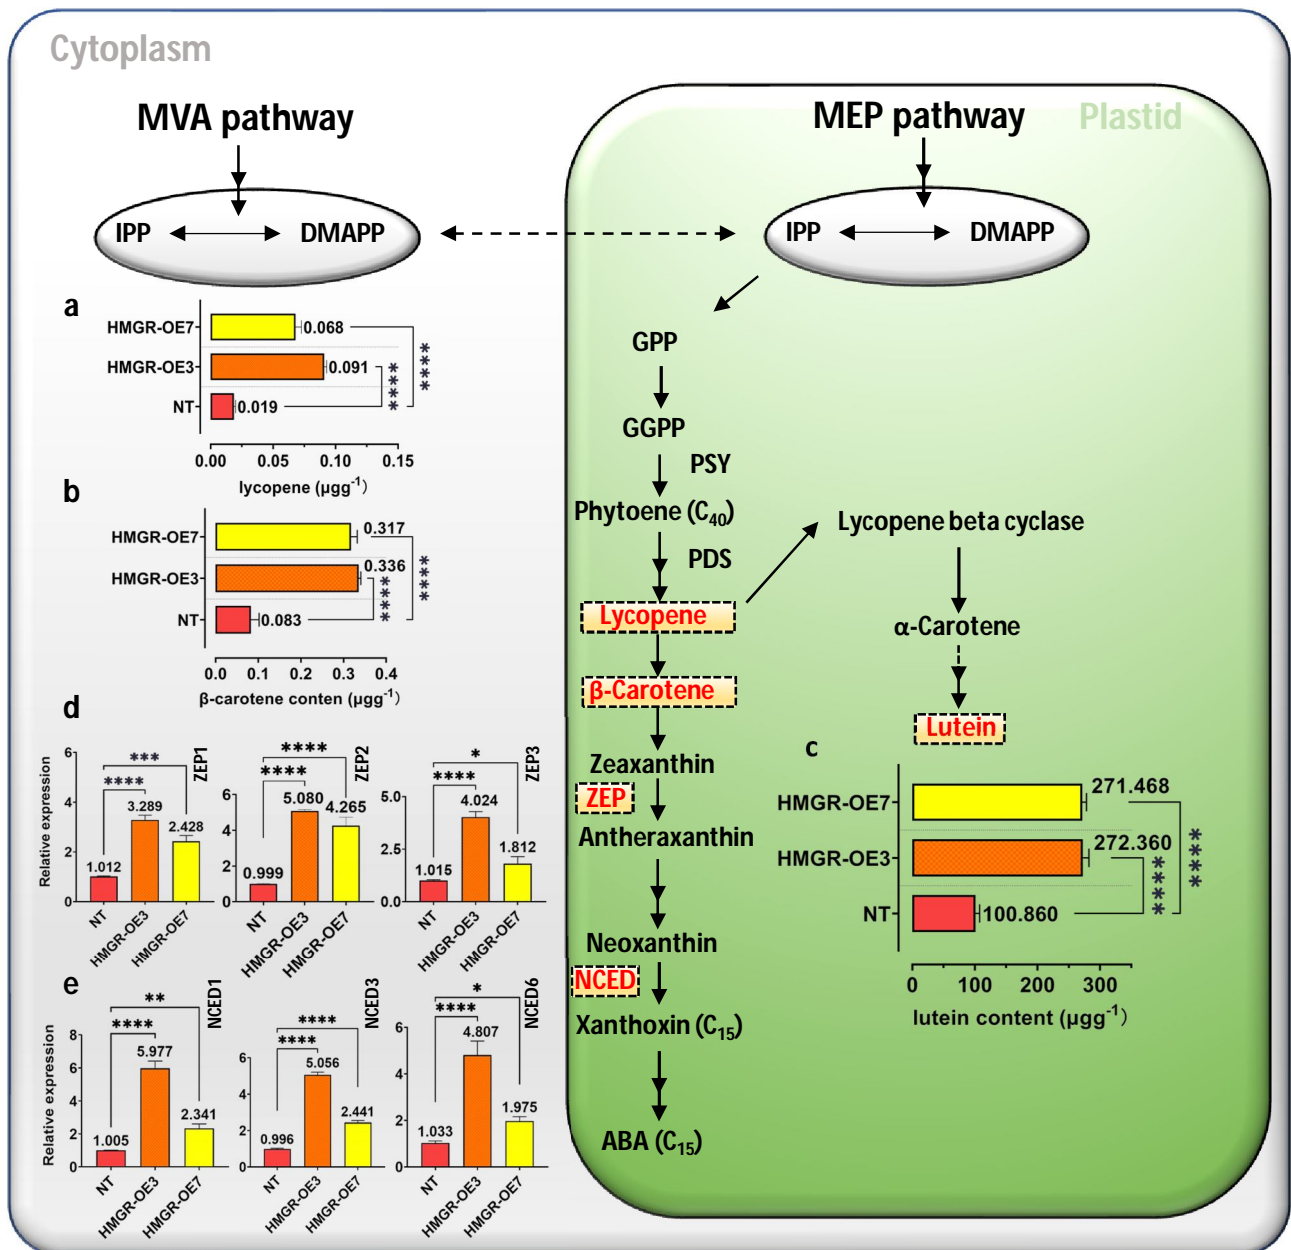

**Figure 2 | HPLC-MS/MS content analyses of lycopene, β-carotene, lutein, and real-time PCR of ZEP and NCED genes family.** HPLC-MS/MS content analyses have been performed to show the effect of *PtHMGR-OEs* on **a**, lycopene **b**, β-carotene, and **c**, lutein. Relative expressions have been analyzed affected by *PtHMGR-OEs* compared with NT poplars of **d**, ZEP, and **e**, NCED genes family. Bars represent mean ± SD (n = 3); Stars reveal significant differences, \* P < 0.05, \*\* P < 0.01, \*\*\* P < 0.001, \*\*\*\*P < 0.0001; Three independent experiments were performed in these analyses.

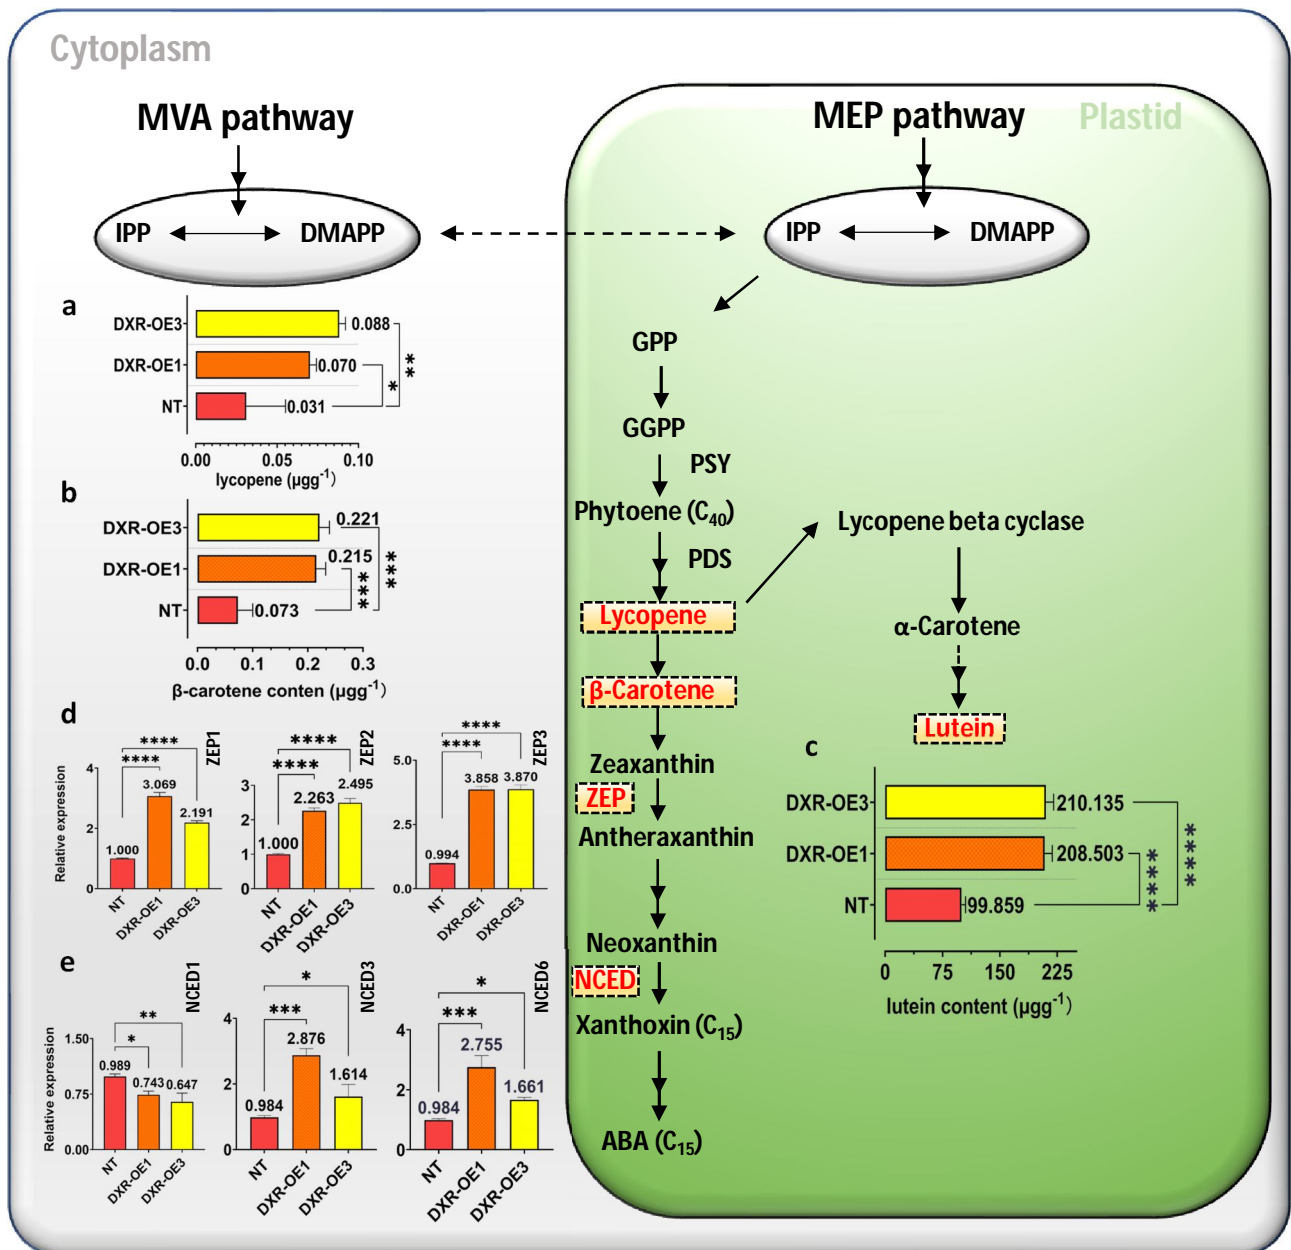

**Figure 3 | HPLC-MS/MS content analyses of lycopene, β-carotene, lutein, and real-time PCR of ZEP and NCED genes family.** HPLC-MS/MS content analyses have been performed to show the effect of *PtDXR-OEs* on **a**, lycopene **b**, β-carotene, and **c**, lutein. Relative expressions have been analyzed affected by *PtDXR-OEs* compared with NT poplars of **d**, ZEP, and **e**, NCED genes family. Bars represent mean ± SD (n = 3); Stars reveal significant differences, \* P < 0.05, \*\* P < 0.01, \*\*\* P < 0.001, \*\*\*\*P < 0.0001; Three independent experiments were performed in these analyses.

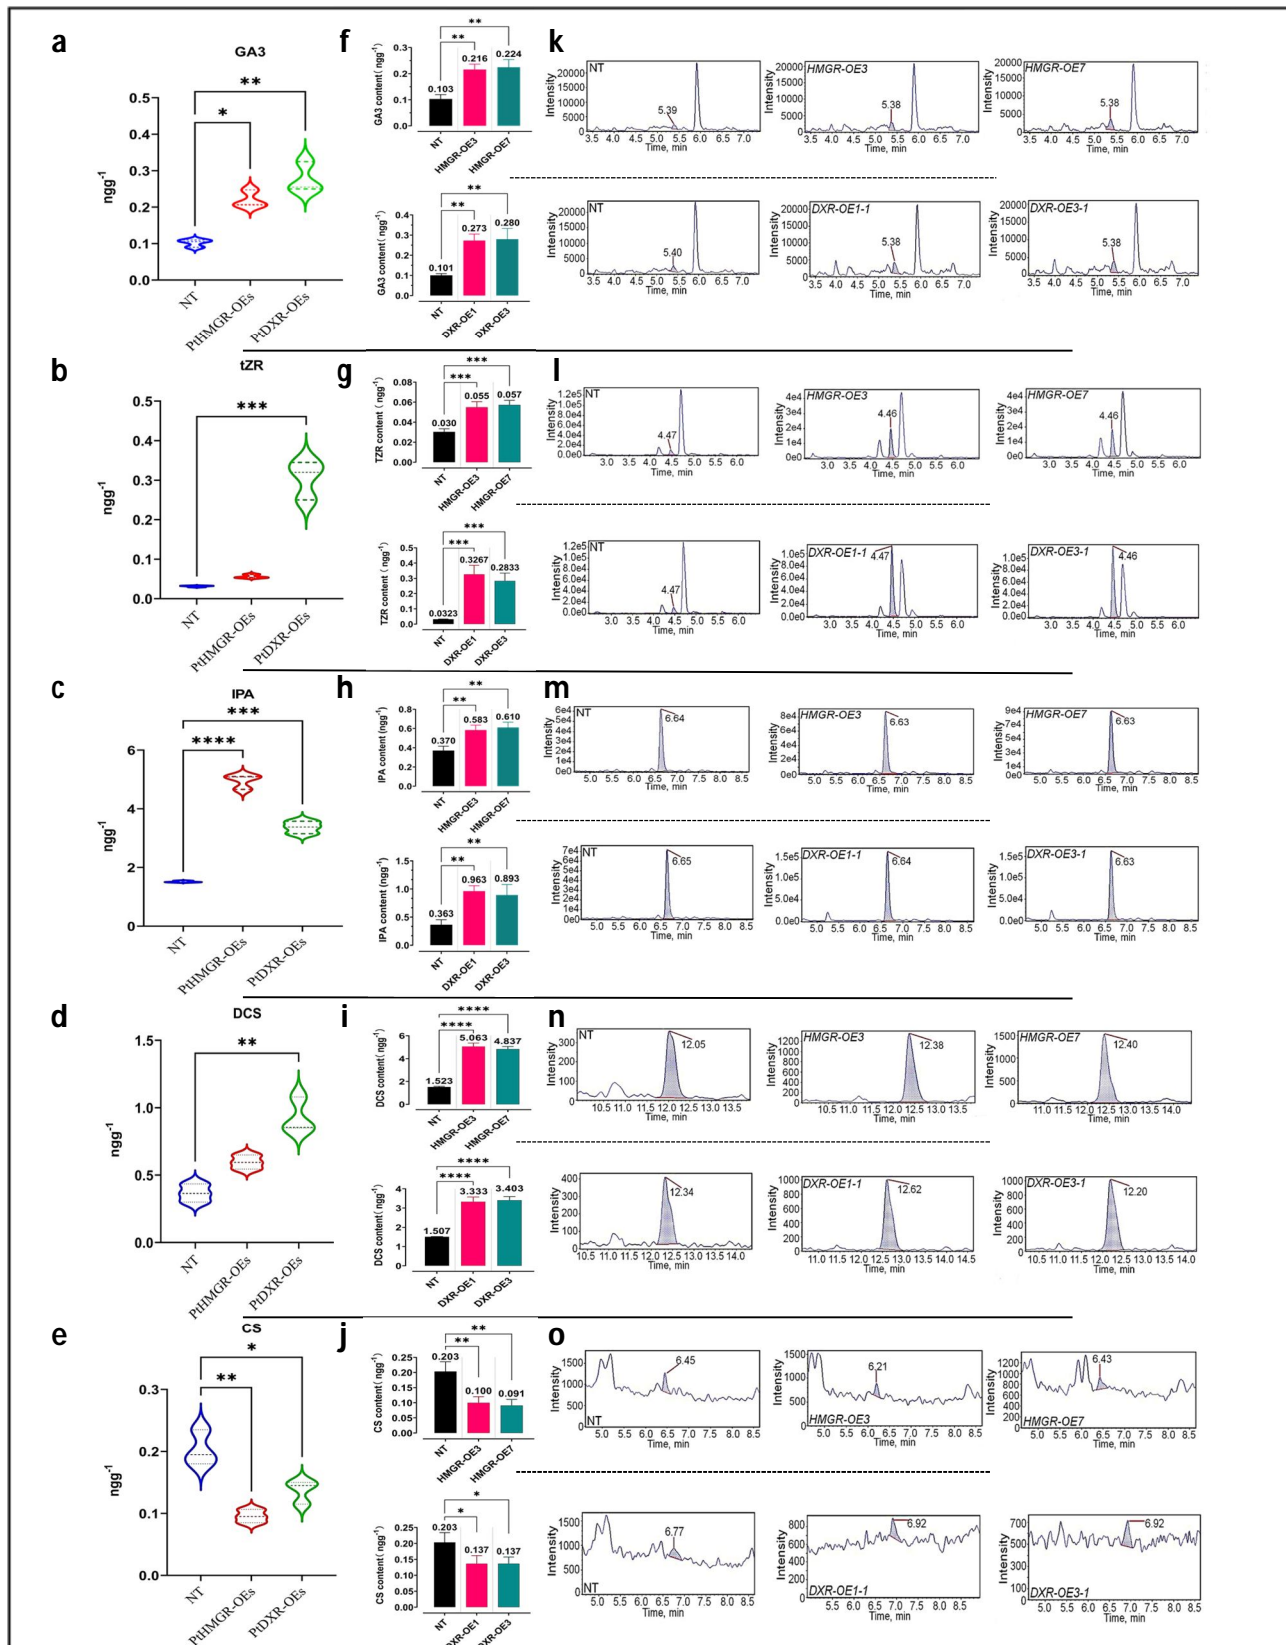

**Figure 4 | HPLC-MS/MS content analyses of MEP- and MVA-derived isoprenoids. a,b,c,d, and e,** Violin plots reveal the contents of isoprenoids GA3, tZR, IPA, DCS, and CS obtained from MEP- and MVA pathways influenced by *PthMGR*- and *PtdXR*-OEs. **f,g,h,i, and j,** the column plots reveal the effect of *PthMGR-OE3* and *-7* and *PtdXR-OE1* and *-3* on the mentioned above isoprenoids separately; NT poplars have been used as the control. Bars represent mean  $\pm$  SD (n = 3); Stars reveal significant differences, \*P < 0.05, \*\*P < 0.01, \*\*\*P < 0.001, \*\*\*\*P < 0.0001. **k,l,m,n, and o,** represent the HPLC-MS/MS chromatogram content analyses of GA3, tZR, IPA, DCS, and CS, respectively affected by *PthMGR*- and *PtdXR*-OEs compared with NT poplars.

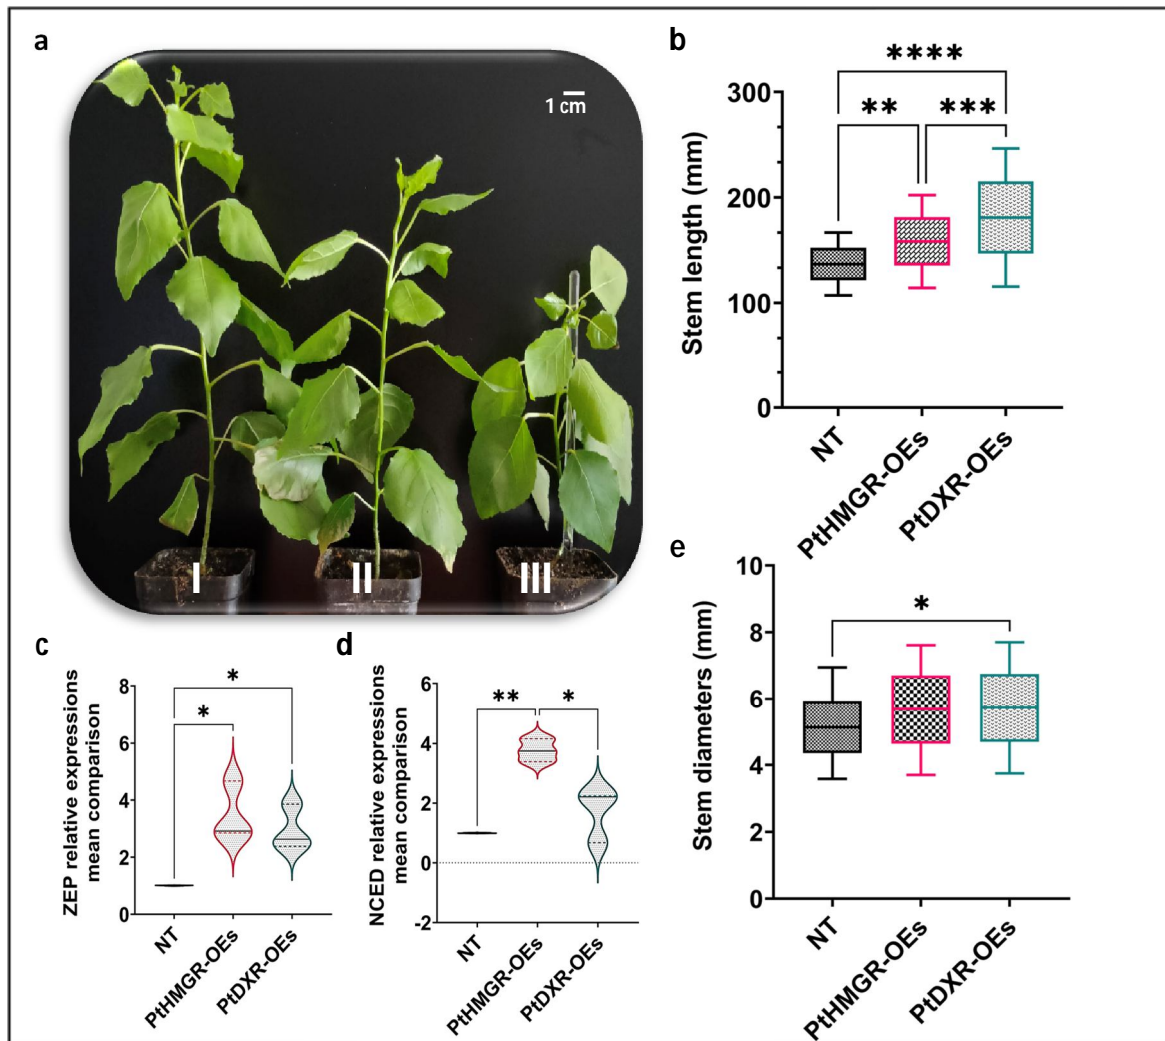

**Figure 5 | Phenotypic changes resulted by affected communications of MVA- and MEP pathways amongst *PtHMGR*- and *PtDXR*-OEs in 45-day-old poplars. a(I), The *PtDXR* transgenic revealed a higher stem length than *PtHMGR*-OEs and NT poplars. a(II), The *PtHMGR* transgenic presents an insignificantly more stem development than NT poplar. a(III), NT poplar was used as a control; Scale bar represents 1 cm. b, The Box and Whisker mean comparison plot of stem lengths revealed significantly higher lengths *PtDXR*-OEs than NT poplars compared with *PtHMGR*-OEs. *PtHMGR* transgenics also revealed significantly higher lengths than NT poplars. c and d, The Violin mean comparison plots of *ZEP* and *NCED* relative expressions between *PtHMGR*- and *PtDXR*-OEs compared to NT poplars. e, The Box and Whisker mean comparison plot of stem diameters revealed less significant differences between *PtDXR*-OEs and NT poplars. Stars reveal significant differences, \*P < 0.05, \*\*P < 0.01, \*\*\*P < 0.001, \*\*\*\*P < 0.0001.**

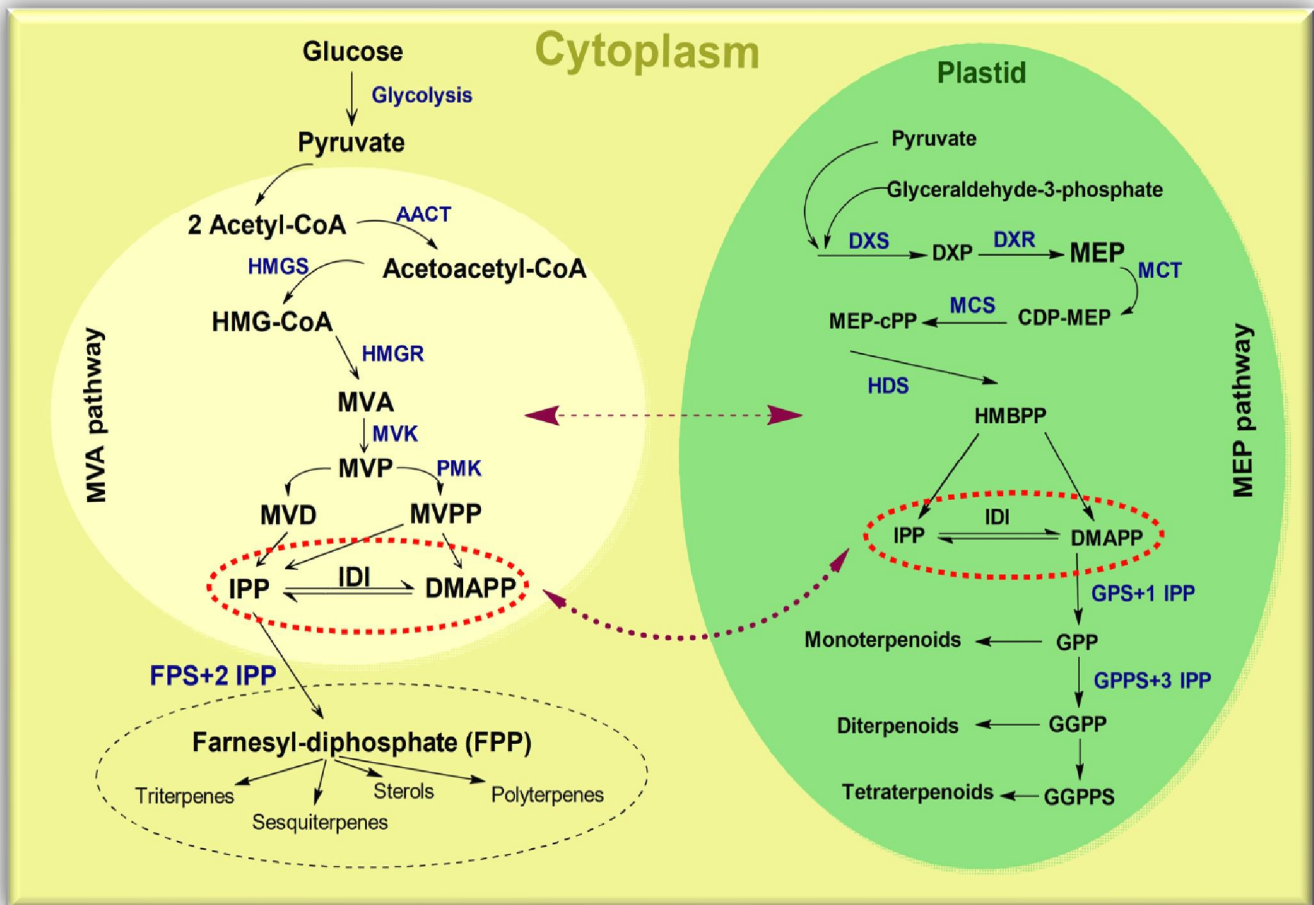

**Figure 6 | Communications exist between MVA- and MEP-pathways excess of IPP and DMAPP.** The IPP and DMAPP are considered the common precursors of the MEP- and MVA pathway between cytoplasm and plastid. In addition, the putative communication generated between MVA- and MEP-related genes and MVA- and MEP-derived products. MVA: mevalonic acid, MEP: methylerythritol phosphate, IPP: isopentenyl diphosphate, DMAPP: dimethylallyl diphosphate, AACT: acetoacetyl CoA thiolase, HMGS: 3-hydroxy-3-methylglutaryl-CoA synthase, HMG-CoA: 3-hydroxy-3-methylglutaryl-CoA, HMGR: 3-hydroxy-3-methylglutaryl-CoA reductase, MVK: mevalonate kinase, MVD: mevalonate5-diphosphate decarboxylase, IPP: isopentenyl diphosphate, IDI: IPP isomerase, GPP: geranyldiphosphate, FPP: famesyldiphosphate, GPS: geranyl phosphate synthase, FPS: farnesyl-diphosphate synthase, GPPS: geranyl diphosphate synthase, GGPPS: geranyl geranyl diphosphate synthase, DXS: 1-deoxy-D-xylulose5-phosphate synthase, DXP: 1-deoxy-D-xylulose5-phosphate, DXR: 1-deoxy-D-xylulose5-phosphate reductoisomerase, HDS: 1-hydroxy-2-methyl-2-(E)-butenyl4-diphosphate synthase, HDR: 1-hydroxy-2-methyl-2-(E)-butenyl4-diphosphate reductase, MCT: MEP cytidyltransferase, CMK: 4-diphosphocytidyl-2-C-methyl-D-erythritol kinase.
